# Supplementary material for: 18Fluorodeoxyglucose uptake in relation to fat fraction and R2* in atherosclerotic plaques, using PET/MRI: a pilot study
Source: PubMed Central journal article supplement (PMC8270927; doi:10.1038/s41598-021-93605-x), 2021-07-09
Supplement: 41598_2021_93605_MOESM1_ESM.pdf [file 41598_2021_93605_MOESM1_ESM.pdf]

# Supplementary Information

<sup>18</sup>Fluorodeoxyglucose uptake in relation to fat fraction and R2\* in  
atherosclerotic plaques, using PET/MRI:  
a pilot study.

Elin Good<sup>1,2,3</sup>, Miguel Ochoa-Figueroa<sup>2, 4, 5</sup>, Magnus Ziegler<sup>1,2</sup>, Marcus Rössner<sup>2, 4, 5</sup>, Marcel Warntjes<sup>1,2,6</sup>, Petter Dyverfeldt<sup>1,2</sup>, Mark Lubberink<sup>7</sup>, Håkan Ahlström<sup>7,8</sup> and Ebo de Muinck<sup>1,2,3</sup>

<sup>1</sup>. Department of Health, Medicine and Caring Sciences, Linköping University, Linköping, Sweden

<sup>2</sup>. Center for Medical Image Science and Visualization (CMIV), Linköping University, Linköping, Sweden

<sup>3</sup>. Department of Cardiology in Linköping, and Department of Health, Medicine and Caring Sciences, Linköping University, Linköping, Sweden

<sup>4</sup>. Department of Clinical Physiology in Linköping, and Department of Health, Medicine and Caring Sciences, Linköping University, Sweden

<sup>5</sup>. Department of Radiology in Linköping, and Department of Health, Medicine and Caring Sciences, Linköping University, Linköping, Sweden

<sup>6</sup>. SyntheticMR AB, Linköping, Sweden

<sup>7</sup>. Department of Surgical Sciences, Section of Radiology, Uppsala University, Uppsala, Sweden

<sup>8</sup>. Antaros Medical AB, Mölndal, Sweden.

## Corresponding Author:

Elin Good, Department of Health,  
Medicine and Caring Sciences,  
Division of Cardiovascular Medicine  
Linköping University  
SE-581 85 Linköping  
Sweden.

Email: [elin.good@liu.se](mailto:elin.good@liu.se)

### Supplementary Table S1. PET and MRI data from Patient 1

| Slice            | SUVmax | SUVmean | SUVmedian | SUVmin | FF mean (%) | FF cum (%mm <sup>3</sup> ) | R2* mean (s <sup>-1</sup> ) | R2* cum (mm <sup>3</sup> /s) | Voxels (N) | Volume (mm <sup>3</sup> ) |
|------------------|--------|---------|-----------|--------|-------------|----------------------------|-----------------------------|------------------------------|------------|---------------------------|
| 1                | 3.55   | 2.67    | 2.66      | 1.72   | 0.128       | 7.7                        | 46.0                        | 2762.1                       | 60         | 15.0                      |
|                  |        |         |           |        | 0.133       | 7.9                        | 47.4                        | 2797.1                       | 59         | 14.8                      |
|                  |        |         |           |        | 0.128       | 7.5                        | 39.8                        | 2347.3                       | 59         | 14.8                      |
| 2                | 3.37   | 2.56    | 2.53      | 1.71   | 0.164       | 10.6                       | 47.4                        | 3080.9                       | 65         | 16.3                      |
|                  |        |         |           |        | 0.152       | 9.4                        | 53.7                        | 3331.8                       | 62         | 15.5                      |
|                  |        |         |           |        | 0.141       | 9.3                        | 54.0                        | 3564.4                       | 66         | 16.5                      |
|                  |        |         |           |        | 0.120       | 7.9                        | 49.6                        | 3275.7                       | 66         | 16.5                      |
| 3                | 2.62   | 2.27    | 2.14      | 1.85   | 0.145       | 8.4                        | 62.1                        | 3602.0                       | 58         | 14.5                      |
|                  |        |         |           |        | 0.145       | 7.4                        | 62.6                        | 3192.3                       | 51         | 12.8                      |
|                  |        |         |           |        | 0.149       | 7.7                        | 64.9                        | 3372.5                       | 52         | 13.0                      |
| 4                | 2.7    | 2.19    | 2.26      | 1.77   | 0.118       | 6.6                        | 69.3                        | 3883.4                       | 56         | 14.0                      |
|                  |        |         |           |        | 0.101       | 5.9                        | 63.4                        | 3676.1                       | 58         | 14.5                      |
|                  |        |         |           |        | 0.126       | 7.6                        | 55.5                        | 3327.7                       | 60         | 15.0                      |
|                  |        |         |           |        | 0.122       | 11.0                       | 47.8                        | 4304.3                       | 90         | 22.5                      |
| 5                | 2.55   | 2.01    | 1.92      | 1.76   | 0.092       | 9.0                        | 47.2                        | 4629.3                       | 98         | 24.5                      |
|                  |        |         |           |        | 0.069       | 6.0                        | 44.0                        | 3829.7                       | 87         | 21.8                      |
|                  |        |         |           |        | 0.063       | 5.8                        | 48.4                        | 4405.8                       | 91         | 22.8                      |
|                  |        |         |           |        | 0.083       | 8.1                        | 46.9                        | 4593.3                       | 98         | 24.5                      |
| 6<br>bifurcation | 2.17   | 1.91    | 1.9       | 1.68   | 0.065       | 7.8                        | 47.6                        | 5709.7                       | 120        | 30.0                      |
|                  |        |         |           |        | 0.067       | 8.4                        | 44.3                        | 5580.7                       | 126        | 31.5                      |
|                  |        |         |           |        | 0.073       | 9.6                        | 44.7                        | 5902.1                       | 132        | 33.0                      |
| 7                | 1.82   | 1.61    | 1.66      | 1.39   | 0.074       | 6.5                        | 50.5                        | 4447.5                       | 88         | 22.0                      |
|                  |        |         |           |        | 0.068       | 6.4                        | 39.5                        | 3716.9                       | 94         | 23.5                      |
|                  |        |         |           |        | 0.065       | 6.5                        | 35.8                        | 3581.8                       | 100        | 25.0                      |
|                  |        |         |           |        | 0.069       | 7.1                        | 38.1                        | 3883.1                       | 102        | 25.5                      |
| 8                | 2.09   | 1.64    | 1.66      | 1.21   | 0.055       | 5.6                        | 32.7                        | 3300.2                       | 101        | 25.3                      |
|                  |        |         |           |        | 0.061       | 5.9                        | 29.8                        | 2923.1                       | 98         | 24.5                      |
|                  |        |         |           |        | 0.060       | 5.6                        | 33.1                        | 3076.6                       | 93         | 23.3                      |
| 9                | 2.54   | 2.15    | 2.16      | 1.92   | 0.072       | 6.4                        | 39.1                        | 3438.1                       | 88         | 22.0                      |
|                  |        |         |           |        | 0.096       | 6.3                        | 49.0                        | 3186.9                       | 65         | 16.3                      |
|                  |        |         |           |        | 0.105       | 6.7                        | 43.7                        | 2799.1                       | 64         | 16.0                      |
|                  |        |         |           |        | 0.105       | 6.0                        | 50.4                        | 2874.4                       | 57         | 14.3                      |
| 10               | 2.99   | 2.24    | 2.18      | 1.76   | 0.146       | 7.7                        | 62.8                        | 3329.7                       | 53         | 13.3                      |
|                  |        |         |           |        | 0.155       | 7.9                        | 76.7                        | 3909.9                       | 51         | 12.8                      |
|                  |        |         |           |        | 0.078       | 4.3                        | 57.1                        | 3139.6                       | 55         | 13.8                      |
| 11               | 2.63   | 2.11    | 2.21      | 1.19   | 0.081       | 4.5                        | 60.9                        | 3411.6                       | 56         | 14.0                      |
|                  |        |         |           |        | 0.071       | 3.8                        | 58.9                        | 3179.9                       | 54         | 13.5                      |
|                  |        |         |           |        | 0.110       | 5.5                        | 47.1                        | 2354.6                       | 50         | 12.5                      |
|                  |        |         |           |        | 0.118       | 5.1                        | 46.0                        | 1979.6                       | 43         | 10.8                      |
| 12               | 2.59   | 2.19    | 2.3       | 1.21   | 0.094       | 3.5                        | 38.3                        | 1415.6                       | 37         | 9.3                       |
|                  |        |         |           |        | 0.127       | 5.1                        | 43.2                        | 1729.3                       | 40         | 10.0                      |
|                  |        |         |           |        | 0.085       | 3.6                        | 25.4                        | 1065.1                       | 42         | 10.5                      |
|                  |        |         |           |        | 0.091       | 3.3                        | 28.0                        | 1007.6                       | 36         | 9.0                       |
| 13               | 2.66   | 2.15    | 2.29      | 1.33   | 0.131       | 8.8                        | 22.2                        | 1488.3                       | 67         | 16.8                      |

**Supplementary Table S2. PET and MRI data from Patient 2**

| Slice            | SUVmax | SUVmean | SUVmedian | SUVmin | FF mean (%) | FF cum (%mm <sup>3</sup> ) | R2* mean (s <sup>-1</sup> ) | R2* cum (mm <sup>3</sup> /s) | Voxels (N) | Volume (mm <sup>3</sup> ) |
|------------------|--------|---------|-----------|--------|-------------|----------------------------|-----------------------------|------------------------------|------------|---------------------------|
| 1                | 3.13   | 2.47    | 2.48      | 1.87   | 0.045       | 3.7                        | 27.6                        | 2261.4                       | 82         | 20.5                      |
|                  |        |         |           |        | 0.065       | 5.5                        | 36.8                        | 3093.5                       | 84         | 21.0                      |
|                  |        |         |           |        | 0.068       | 5.7                        | 38.0                        | 3191.3                       | 84         | 21.0                      |
|                  |        |         |           |        | 0.094       | 8.2                        | 37.6                        | 3269.0                       | 87         | 21.8                      |
| 2                | 2.71   | 2.28    | 2.23      | 1.79   | 0.066       | 4.9                        | 31.5                        | 2331.5                       | 74         | 18.5                      |
|                  |        |         |           |        | 0.075       | 5.7                        | 23.3                        | 1772.3                       | 76         | 19.0                      |
|                  |        |         |           |        | 0.075       | 5.3                        | 35.2                        | 2465.2                       | 70         | 17.5                      |
| 3                | 2.96   | 2.01    | 1.99      | 1.47   | 0.064       | 4.1                        | 29.0                        | 1855.6                       | 64         | 16.0                      |
|                  |        |         |           |        | 0.075       | 4.4                        | 40.4                        | 2384.4                       | 59         | 14.8                      |
|                  |        |         |           |        | 0.144       | 7.9                        | 72.2                        | 3973.6                       | 55         | 13.8                      |
|                  |        |         |           |        | 0.155       | 8.2                        | 88.1                        | 4669.1                       | 53         | 13.3                      |
| 4                | 2.65   | 1.83    | 1.79      | 1.33   | 0.159       | 8.5                        | 93.1                        | 4934.5                       | 53         | 13.3                      |
|                  |        |         |           |        | 0.164       | 11.0                       | 90.1                        | 6038.6                       | 67         | 16.8                      |
|                  |        |         |           |        | 0.145       | 9.5                        | 87.6                        | 5780.3                       | 66         | 16.5                      |
| 5                | 2.36   | 1.8     | 1.82      | 1.36   | 0.099       | 6.4                        | 64.4                        | 4122.7                       | 64         | 16.0                      |
|                  |        |         |           |        | 0.109       | 7.4                        | 61.3                        | 4168.2                       | 68         | 17.0                      |
|                  |        |         |           |        | 0.112       | 8.2                        | 56.6                        | 4135.0                       | 73         | 18.3                      |
|                  |        |         |           |        | 0.125       | 9.7                        | 52.7                        | 4110.6                       | 78         | 19.5                      |
| 6                | 2.36   | 1.96    | 1.98      | 1.29   | 0.145       | 11.3                       | 64.9                        | 5064.1                       | 78         | 19.5                      |
|                  |        |         |           |        | 0.168       | 14.4                       | 70.8                        | 6090.1                       | 86         | 21.5                      |
|                  |        |         |           |        | 0.155       | 14.5                       | 79.6                        | 7399.9                       | 93         | 23.3                      |
|                  |        |         |           |        | 0.140       | 12.6                       | 67.7                        | 6095.6                       | 90         | 22.5                      |
| 7<br>bifurcation | 2.31   | 1.89    | 1.9       | 1.48   | 0.148       | 12.9                       | 51.9                        | 4516.2                       | 87         | 21.8                      |
|                  |        |         |           |        | 0.153       | 13.6                       | 48.0                        | 4271.3                       | 89         | 22.3                      |
|                  |        |         |           |        | 0.156       | 13.2                       | 39.9                        | 3388.1                       | 85         | 21.3                      |
| 8                | 2.09   | 1.56    | 1.49      | 1.29   | 0.216       | 10.8                       | 36.2                        | 1808.4                       | 50         | 12.5                      |
|                  |        |         |           |        | 0.200       | 10.0                       | 36.7                        | 1836.6                       | 50         | 12.5                      |
|                  |        |         |           |        | 0.233       | 12.8                       | 44.0                        | 2419.6                       | 55         | 13.8                      |
| 9                | 2.35   | 1.49    | 1.38      | 1.17   | 0.232       | 13.5                       | 39.3                        | 2279.9                       | 58         | 14.5                      |
|                  |        |         |           |        | 0.222       | 12.0                       | 32.6                        | 1759.6                       | 54         | 13.5                      |
|                  |        |         |           |        | 0.210       | 10.9                       | 32.2                        | 1672.3                       | 52         | 13.0                      |
| 10               | 2.45   | 2.17    | 2.27      | 1.63   | 0.221       | 12.4                       | 32.3                        | 1808.4                       | 56         | 14.0                      |
|                  |        |         |           |        | 0.237       | 11.4                       | 30.4                        | 1460.4                       | 48         | 12.0                      |
|                  |        |         |           |        | 0.236       | 7.3                        | 38.3                        | 1186.1                       | 31         | 7.8                       |
| 11               | 2.77   | 1.77    | 1.62      | 0.97   | 0.242       | 7.3                        | 37.6                        | 1127.7                       | 30         | 7.5                       |
|                  |        |         |           |        | 0.213       | 8.3                        | 47.3                        | 1844.9                       | 39         | 9.8                       |
|                  |        |         |           |        | 0.254       | 10.4                       | 51.6                        | 2116.7                       | 41         | 10.3                      |
| 12               | 2.47   | 1.84    | 1.79      | 1.32   | 0.300       | 11.4                       | 47.1                        | 1789.8                       | 38         | 9.5                       |
|                  |        |         |           |        | 0.268       | 8.6                        | 32.0                        | 1024.4                       | 32         | 8.0                       |
|                  |        |         |           |        | 0.297       | 9.2                        | 31.4                        | 972.4                        | 31         | 7.7                       |
| 13               | 2.57   | 2.11    | 2.2       | 1.35   | 0.271       | 7.0                        | 33.4                        | 868.4                        | 26         | 6.5                       |
|                  |        |         |           |        | 0.269       | 6.7                        | 57.7                        | 1442.2                       | 25         | 6.3                       |
|                  |        |         |           |        | 0.259       | 6.5                        | 57.9                        | 1446.3                       | 25         | 6.3                       |
| 14               | 3.13   | 2.47    | 2.48      | 1.87   | 0.045       | 3.7                        | 27.6                        | 2261.4                       | 82         | 20.5                      |
|                  |        |         |           |        | 0.065       | 5.5                        | 36.8                        | 3093.5                       | 84         | 21.0                      |
|                  |        |         |           |        | 0.068       | 5.7                        | 38.0                        | 3191.3                       | 84         | 21.0                      |

### Supplementary Table S3. PET and MRI data from Patient 3

| Slice            | SUVmax | SUVmean | SUVmedian | SUVmin | FF mean (%) | FF cum (%mm <sup>3</sup> ) | R2* mean (s <sup>-1</sup> ) | R2* cum (mm <sup>3</sup> /s) | Voxels (N) | Volume (mm <sup>3</sup> ) |
|------------------|--------|---------|-----------|--------|-------------|----------------------------|-----------------------------|------------------------------|------------|---------------------------|
| 1                | 4.95   | 3.81    | 3.81      | 2.5    | 0.238       | 10.5                       | 9.1                         | 400.8                        | 44         | 11.0                      |
|                  |        |         |           |        | 0.304       | 10.3                       | 19.1                        | 650.4                        | 34         | 8.5                       |
|                  |        |         |           |        | 0.323       | 11.0                       | 18.0                        | 611.1                        | 34         | 8.5                       |
|                  |        |         |           |        | 0.339       | 11.5                       | 19.8                        | 673.2                        | 34         | 8.5                       |
| 2                | 5.23   | 3.67    | 3.89      | 1.63   | 0.331       | 17.2                       | 17.8                        | 923.5                        | 52         | 13.0                      |
|                  |        |         |           |        | 0.339       | 20.3                       | 17.7                        | 1063.7                       | 60         | 15.0                      |
|                  |        |         |           |        | 0.328       | 20.0                       | 17.2                        | 1051.2                       | 61         | 15.3                      |
| 3                | 6.97   | 5       | 4.93      | 2.36   | 0.320       | 18.6                       | 14.6                        | 844.4                        | 58         | 14.5                      |
|                  |        |         |           |        | 0.302       | 19.3                       | 14.7                        | 940.4                        | 64         | 16.0                      |
|                  |        |         |           |        | 0.278       | 19.2                       | 12.4                        | 853.1                        | 69         | 17.2                      |
|                  |        |         |           |        | 0.269       | 19.1                       | 11.7                        | 829.1                        | 71         | 17.8                      |
| 4                | 10.34  | 7.11    | 7.29      | 2.88   | 0.253       | 19.4                       | 12.4                        | 954.1                        | 77         | 19.3                      |
|                  |        |         |           |        | 0.271       | 18.5                       | 19.9                        | 1352.7                       | 68         | 17.0                      |
|                  |        |         |           |        | 0.322       | 21.0                       | 30.1                        | 1955.8                       | 65         | 16.3                      |
| 5                | 10.73  | 6.82    | 6.41      | 2.97   | 0.331       | 22.2                       | 32.1                        | 2152.3                       | 67         | 16.8                      |
|                  |        |         |           |        | 0.346       | 27.4                       | 40.4                        | 3192.9                       | 79         | 19.8                      |
|                  |        |         |           |        | 0.321       | 25.6                       | 37.4                        | 2995.5                       | 80         | 20.0                      |
|                  |        |         |           |        | 0.277       | 24.1                       | 30.3                        | 2631.8                       | 87         | 21.8                      |
| 6                | 5.51   | 3.77    | 3.77      | 2.23   | 0.269       | 23.1                       | 31.2                        | 2682.6                       | 86         | 21.5                      |
|                  |        |         |           |        | 0.256       | 20.7                       | 29.0                        | 2351.1                       | 81         | 20.3                      |
|                  |        |         |           |        | 0.282       | 24.0                       | 26.4                        | 2247.0                       | 85         | 21.3                      |
|                  |        |         |           |        | 0.250       | 20.7                       | 24.2                        | 2006.0                       | 83         | 20.8                      |
| 7<br>bifurcation | 5.12   | 3.82    | 3.64      | 2.81   | 0.250       | 19.5                       | 27.3                        | 2132.1                       | 78         | 19.5                      |
|                  |        |         |           |        | 0.301       | 26.5                       | 28.7                        | 2528.3                       | 88         | 22.0                      |
|                  |        |         |           |        | 0.274       | 23.5                       | 21.2                        | 1821.0                       | 86         | 21.5                      |
|                  |        |         |           |        | 0.251       | 20.6                       | 17.4                        | 1429.9                       | 82         | 20.5                      |
| 8                | 8.79   | 4.21    | 4.2       | 2.81   | 0.284       | 23.9                       | 18.6                        | 1559.9                       | 84         | 21.0                      |
|                  |        |         |           |        | 0.309       | 25.6                       | 23.1                        | 1921.0                       | 83         | 20.8                      |
|                  |        |         |           |        | 0.314       | 23.5                       | 28.2                        | 2116.0                       | 75         | 18.8                      |
|                  |        |         |           |        | 0.312       | 26.2                       | 25.5                        | 2143.3                       | 84         | 21.0                      |
| 9                | 10.12  | 5.52    | 5.24      | 3.06   | 0.336       | 27.2                       | 33.0                        | 2669.1                       | 81         | 20.3                      |
|                  |        |         |           |        | 0.359       | 30.9                       | 36.9                        | 3177.4                       | 86         | 21.5                      |
|                  |        |         |           |        | 0.334       | 30.4                       | 29.6                        | 2696.5                       | 91         | 22.8                      |
| 10               | 8.31   | 4.67    | 4.05      | 2.75   | 0.341       | 23.2                       | 33.1                        | 2248.6                       | 68         | 17.0                      |
|                  |        |         |           |        | 0.363       | 21.1                       | 32.7                        | 1897.8                       | 58         | 14.5                      |
|                  |        |         |           |        | 0.365       | 20.4                       | 33.8                        | 1892.5                       | 56         | 14.0                      |
|                  |        |         |           |        | 0.333       | 34.9                       | 21.5                        | 2258.9                       | 105        | 26.2                      |
| 11               | 4.8    | 4.02    | 3.95      | 2.91   | 0.305       | 32.1                       | 15.0                        | 1573.1                       | 105        | 26.3                      |
|                  |        |         |           |        | 0.304       | 31.3                       | 13.4                        | 1383.6                       | 103        | 25.8                      |
|                  |        |         |           |        | 0.334       | 12.4                       | 7.4                         | 273.5                        | 37         | 9.2                       |
|                  |        |         |           |        | 0.313       | 10.3                       | 9.3                         | 306.8                        | 33         | 8.3                       |
| 12               | 4.55   | 3.54    | 3.47      | 2.55   | 0.247       | 6.9                        | 6.6                         | 185.5                        | 28         | 7.0                       |
|                  |        |         |           |        | 0.362       | 12.3                       | 19.2                        | 653.9                        | 34         | 8.5                       |
|                  |        |         |           |        | 0.393       | 14.9                       | 32.0                        | 1214.9                       | 38         | 9.5                       |
|                  |        |         |           |        | 0.377       | 11.3                       | 23.5                        | 705.4                        | 30         | 7.5                       |
| 13               | 3.68   | 3.05    | 3.05      | 2.18   | 0.367       | 17.6                       | 27.4                        | 1313.8                       | 48         | 12.0                      |

**Supplementary Table S4. PET and MRI data from Patient 4**

| Slice            | SUVmax | SUVmean | SUVmedian | SUVmin | FF mean (%) | FF cum (%mm <sup>3</sup> ) | R2* mean (s <sup>-1</sup> ) | R2* cum (mm <sup>3</sup> /s) | Voxels (N) | Volume (mm <sup>3</sup> ) |
|------------------|--------|---------|-----------|--------|-------------|----------------------------|-----------------------------|------------------------------|------------|---------------------------|
| 1                | 2.07   | 1.7     | 1.67      | 1.27   | 0.255       | 8.9                        | 26.7                        | 933.8                        | 35         | 8.8                       |
|                  |        |         |           |        | 0.243       | 8.5                        | 31.6                        | 1104.9                       | 35         | 8.7                       |
|                  |        |         |           |        | 0.280       | 9.2                        | 42.7                        | 1407.7                       | 33         | 8.2                       |
| 2                | 2.07   | 1.66    | 1.63      | 1.22   | 0.252       | 10.8                       | 33.5                        | 1441.0                       | 43         | 10.8                      |
|                  |        |         |           |        | 0.266       | 11.7                       | 22.6                        | 995.0                        | 44         | 11.0                      |
|                  |        |         |           |        | 0.246       | 9.1                        | 34.9                        | 1290.6                       | 37         | 9.3                       |
|                  |        |         |           |        | 0.206       | 6.8                        | 34.2                        | 1128.8                       | 33         | 8.3                       |
| 3                | 2.07   | 1.59    | 1.58      | 1.06   | 0.236       | 9.4                        | 36.6                        | 1463.3                       | 40         | 10.0                      |
|                  |        |         |           |        | 0.247       | 8.4                        | 26.8                        | 912.4                        | 34         | 8.5                       |
|                  |        |         |           |        | 0.274       | 13.7                       | 46.7                        | 2334.3                       | 50         | 12.5                      |
|                  |        |         |           |        | 0.222       | 11.3                       | 62.4                        | 3180.4                       | 51         | 12.8                      |
| 4<br>bifurcation | 2.25   | 1.67    | 1.64      | 1.35   | 0.276       | 16.0                       | 64.9                        | 3764.5                       | 58         | 14.5                      |
|                  |        |         |           |        | 0.252       | 14.9                       | 65.9                        | 3889.9                       | 59         | 14.8                      |
|                  |        |         |           |        | 0.243       | 13.6                       | 61.7                        | 3457.5                       | 56         | 14.0                      |
| 5                | 2.02   | 1.68    | 1.67      | 1.36   | 0.257       | 16.2                       | 46.4                        | 2923.3                       | 63         | 15.8                      |
|                  |        |         |           |        | 0.257       | 16.2                       | 53.1                        | 3345.4                       | 63         | 15.8                      |
|                  |        |         |           |        | 0.208       | 13.1                       | 64.3                        | 4049.1                       | 63         | 15.8                      |
|                  |        |         |           |        | 0.267       | 14.7                       | 95.3                        | 5242.0                       | 55         | 13.8                      |
|                  |        |         |           |        | 0.223       | 13.2                       | 93.2                        | 5499.7                       | 59         | 14.8                      |
| 6                | 2.15   | 1.71    | 1.71      | 1.29   | 0.239       | 9.5                        | 100.9                       | 4036.1                       | 40         | 10.0                      |
|                  |        |         |           |        | 0.282       | 11.3                       | 68.9                        | 2755.9                       | 40         | 10.0                      |
|                  |        |         |           |        | 0.255       | 9.5                        | 85.9                        | 3179.7                       | 37         | 9.3                       |
| 7                | 1.86   | 1.59    | 1.61      | 1.38   | 0.221       | 9.5                        | 80.7                        | 3471.7                       | 43         | 10.8                      |
|                  |        |         |           |        | 0.288       | 13.0                       | 80.1                        | 3603.5                       | 45         | 11.3                      |
|                  |        |         |           |        | 0.254       | 9.7                        | 73.3                        | 2786.1                       | 38         | 9.5                       |
|                  |        |         |           |        | 0.255       | 10.5                       | 71.4                        | 2927.6                       | 41         | 10.3                      |
| 8                | 2.07   | 1.76    | 1.74      | 1.36   | 0.197       | 7.1                        | 75.6                        | 2722.9                       | 36         | 9.0                       |
|                  |        |         |           |        | 0.298       | 4.5                        | 52.1                        | 780.8                        | 15         | 3.8                       |
|                  |        |         |           |        | 0.187       | 4.3                        | 42.6                        | 980.4                        | 23         | 5.8                       |
| 9                | 1.61   | 1.37    | 1.38      | 1.07   | 0.253       | 6.6                        | 40.6                        | 1055.1                       | 26         | 6.5                       |
|                  |        |         |           |        | 0.312       | 12.2                       | 67.0                        | 2614.1                       | 39         | 9.8                       |
|                  |        |         |           |        | 0.340       | 13.3                       | 59.7                        | 2328.9                       | 39         | 9.8                       |
|                  |        |         |           |        | 0.236       | 5.9                        | 73.7                        | 1842.5                       | 25         | 6.2                       |
| 10               | 1.75   | 1.5     | 1.47      | 1.26   | 0.257       | 8.0                        | 60.9                        | 1887.5                       | 31         | 7.7                       |
|                  |        |         |           |        | 0.253       | 8.1                        | 53.9                        | 1723.9                       | 32         | 8.0                       |
|                  |        |         |           |        | 0.275       | 11.6                       | 57.0                        | 2396.0                       | 42         | 10.5                      |
| 11               | 2.06   | 1.7     | 1.72      | 1.16   | 0.246       | 11.8                       | 66.7                        | 3201.9                       | 48         | 12.0                      |
|                  |        |         |           |        | 0.279       | 12.8                       | 69.9                        | 3216.0                       | 46         | 11.5                      |
|                  |        |         |           |        | 0.280       | 10.6                       | 43.6                        | 1658.6                       | 38         | 9.5                       |
| 12               | 2.2    | 1.71    | 1.66      | 1.16   | 0.259       | 10.4                       | 44.5                        | 1781.0                       | 40         | 10.0                      |
|                  |        |         |           |        | 0.261       | 9.1                        | 55.1                        | 1927.9                       | 35         | 8.8                       |
|                  |        |         |           |        | 0.251       | 5.5                        | 22.3                        | 491.4                        | 22         | 5.5                       |
| 13               | 2.3    | 1.77    | 1.7       | 1.38   | 0.198       | 4.9                        | 19.7                        | 492.6                        | 25         | 6.2                       |
|                  |        |         |           |        | 0.217       | 5.6                        | 23.7                        | 617.2                        | 26         | 6.5                       |
|                  |        |         |           |        | 0.215       | 5.6                        | 20.7                        | 538.4                        | 26         | 6.5                       |

**Supplementary Table S5. PET and MRI data from Patient 5**

| Slice            | SUVmax | SUVmean | SUVmedian | SUVmin | FF mean (%) | FF cum (%mm <sup>3</sup> ) | R2* mean (s <sup>-1</sup> ) | R2* cum (mm <sup>3</sup> /s) | Voxels (N) | Volume (mm <sup>3</sup> ) |
|------------------|--------|---------|-----------|--------|-------------|----------------------------|-----------------------------|------------------------------|------------|---------------------------|
| 1                | 3.03   | 2.44    | 2.41      | 1.65   | 0.058       | 4.8                        | 33.2                        | 2787.2                       | 84         | 21.0                      |
|                  |        |         |           |        | 0.061       | 5.0                        | 26.8                        | 2198.7                       | 82         | 20.5                      |
|                  |        |         |           |        | 0.070       | 5.7                        | 30.0                        | 2456.4                       | 82         | 20.5                      |
| 2                | 4.66   | 2.46    | 2.36      | 1.08   | 0.075       | 6.1                        | 36.0                        | 2954.0                       | 82         | 20.5                      |
|                  |        |         |           |        | 0.078       | 6.9                        | 32.4                        | 2883.3                       | 89         | 22.3                      |
|                  |        |         |           |        | 0.112       | 11.2                       | 27.7                        | 2765.3                       | 100        | 25.0                      |
|                  |        |         |           |        | 0.118       | 11.4                       | 32.4                        | 3113.1                       | 96         | 24.0                      |
| 3                | 4.67   | 3.02    | 2.64      | 1.83   | 0.109       | 10.4                       | 34.9                        | 3310.9                       | 95         | 23.8                      |
|                  |        |         |           |        | 0.112       | 14.6                       | 38.3                        | 4983.9                       | 130        | 32.5                      |
|                  |        |         |           |        | 0.102       | 13.2                       | 47.1                        | 6128.7                       | 130        | 32.5                      |
| 4                | 4.67   | 2.63    | 2.21      | 1.69   | 0.096       | 14.2                       | 47.6                        | 7051.4                       | 148        | 37.0                      |
|                  |        |         |           |        | 0.112       | 16.7                       | 48.6                        | 7291.5                       | 150        | 37.5                      |
|                  |        |         |           |        | 0.101       | 14.7                       | 51.4                        | 7505.7                       | 146        | 36.5                      |
|                  |        |         |           |        | 0.086       | 8.2                        | 53.9                        | 5123.8                       | 95         | 23.8                      |
| 5                | 3.19   | 2.38    | 2.43      | 1.53   | 0.086       | 8.4                        | 48.8                        | 4778.7                       | 98         | 24.5                      |
|                  |        |         |           |        | 0.084       | 7.6                        | 46.3                        | 4163.8                       | 90         | 22.5                      |
|                  |        |         |           |        | 0.068       | 6.2                        | 37.0                        | 3405.7                       | 92         | 23.0                      |
|                  |        |         |           |        | 0.073       | 6.3                        | 46.7                        | 4064.1                       | 87         | 21.8                      |
| 6<br>bifurcation | 3.19   | 2.3     | 2.26      | 1.55   | 0.067       | 7.0                        | 61.9                        | 6440.9                       | 104        | 26.0                      |
|                  |        |         |           |        | 0.073       | 9.2                        | 73.5                        | 9258.3                       | 126        | 31.5                      |
|                  |        |         |           |        | 0.095       | 12.0                       | 73.0                        | 9196.2                       | 126        | 31.5                      |
| 7                | 3.67   | 2.4     | 2.15      | 1.5    | 0.094       | 17.0                       | 70.3                        | 12726.1                      | 181        | 45.3                      |
|                  |        |         |           |        | 0.115       | 21.2                       | 68.6                        | 12615.5                      | 184        | 46.0                      |
|                  |        |         |           |        | 0.099       | 15.8                       | 78.5                        | 12564.8                      | 160        | 40.0                      |
|                  |        |         |           |        | 0.171       | 13.0                       | 93.1                        | 7077.6                       | 76         | 19.0                      |
| 8                | 3.69   | 2.58    | 2.5       | 1.67   | 0.149       | 10.0                       | 88.5                        | 5930.1                       | 67         | 16.8                      |
|                  |        |         |           |        | 0.099       | 9.6                        | 103.4                       | 10028.1                      | 97         | 24.3                      |
|                  |        |         |           |        | 0.115       | 13.0                       | 75.6                        | 8545.5                       | 113        | 28.3                      |
| 9                | 2.79   | 2.33    | 2.46      | 1.73   | 0.144       | 16.8                       | 74.4                        | 8706.4                       | 117        | 29.3                      |
|                  |        |         |           |        | 0.132       | 21.2                       | 64.1                        | 10317.9                      | 161        | 40.2                      |
|                  |        |         |           |        | 0.108       | 18.5                       | 67.7                        | 11579.1                      | 171        | 42.8                      |
|                  |        |         |           |        | 0.115       | 18.6                       | 67.4                        | 10924.5                      | 162        | 40.5                      |
| 10               | 2.31   | 1.8     | 1.78      | 1.08   | 0.098       | 14.4                       | 66.5                        | 9706.5                       | 146        | 36.5                      |
|                  |        |         |           |        | 0.130       | 18.9                       | 79.0                        | 11449.2                      | 145        | 36.3                      |
|                  |        |         |           |        | 0.137       | 10.6                       | 80.4                        | 6193.5                       | 77         | 19.3                      |
| 11               | 2.07   | 1.81    | 1.85      | 1.29   | 0.110       | 7.7                        | 90.9                        | 6361.4                       | 70         | 17.5                      |
|                  |        |         |           |        | 0.131       | 9.2                        | 72.4                        | 5071.3                       | 70         | 17.5                      |
|                  |        |         |           |        | 0.135       | 14.0                       | 72.0                        | 7485.5                       | 104        | 26.0                      |
|                  |        |         |           |        | 0.135       | 14.8                       | 62.4                        | 6859.6                       | 110        | 27.5                      |
| 12               | 2.36   | 1.93    | 2.02      | 1.14   | 0.141       | 13.8                       | 62.8                        | 6150.5                       | 98         | 24.5                      |
|                  |        |         |           |        | 0.147       | 8.2                        | 53.8                        | 3010.5                       | 56         | 14.0                      |
|                  |        |         |           |        | 0.118       | 6.2                        | 27.0                        | 1429.4                       | 53         | 13.3                      |
|                  |        |         |           |        | 0.127       | 6.6                        | 42.8                        | 2227.9                       | 52         | 13.0                      |
| 13               | 2.67   | 2.12    | 2.09      | 1.65   | 0.113       | 6.6                        | 30.6                        | 1773.1                       | 58         | 14.5                      |

## Supplementary Table S6. PET and MRI data from Patient 6

| Slice            | SUVmax | SUVmean | SUVmedian | SUVmin | FF mean (%) | FF cum (%mm <sup>3</sup> ) | R2* mean (s <sup>-1</sup> ) | R2* cum (mm <sup>3</sup> /s) | Voxels (N) | Volume (mm <sup>3</sup> ) |
|------------------|--------|---------|-----------|--------|-------------|----------------------------|-----------------------------|------------------------------|------------|---------------------------|
| 1                | 1.54   | 1.23    | 1.28      | 0.95   | 0.121       | 4.1                        | 59.3                        | 2015.5                       | 34         | 8.5                       |
|                  |        |         |           |        | 0.136       | 5.7                        | 49.9                        | 2096.2                       | 42         | 10.5                      |
|                  |        |         |           |        | 0.132       | 5.9                        | 35.4                        | 1594.9                       | 45         | 11.3                      |
|                  |        |         |           |        | 0.145       | 6.8                        | 25.6                        | 1205.1                       | 47         | 11.8                      |
| 2                | 1.60   | 1.17    | 1.16      | 0.85   | 0.104       | 3.5                        | 31.3                        | 1063.2                       | 34         | 8.5                       |
|                  |        |         |           |        | 0.093       | 3.2                        | 29.9                        | 1016.0                       | 34         | 8.5                       |
|                  |        |         |           |        | 0.062       | 2.0                        | 34.6                        | 1140.2                       | 33         | 8.3                       |
| 3                | 1.73   | 1.08    | 1.05      | 0.82   | 0.053       | 1.9                        | 34.7                        | 1250.7                       | 36         | 9.0                       |
|                  |        |         |           |        | 0.067       | 2.4                        | 51.4                        | 1852.0                       | 36         | 9.0                       |
|                  |        |         |           |        | 0.100       | 4.4                        | 71.8                        | 3160.5                       | 44         | 11.0                      |
|                  |        |         |           |        | 0.145       | 12.2                       | 61.4                        | 5159.4                       | 84         | 21.0                      |
| 4                | 1.12   | 0.98    | 0.99      | 0.81   | 0.202       | 17.4                       | 52.9                        | 4548.4                       | 86         | 21.5                      |
|                  |        |         |           |        | 0.261       | 16.9                       | 50.3                        | 3269.6                       | 65         | 16.3                      |
|                  |        |         |           |        | 0.261       | 20.1                       | 58.5                        | 4502.6                       | 77         | 19.3                      |
|                  |        |         |           |        | 0.205       | 14.8                       | 58.4                        | 4203.7                       | 72         | 18.0                      |
| 5<br>bifurcation | 1.10   | 0.92    | 0.91      | 0.71   | 0.194       | 12.8                       | 68.3                        | 4510.7                       | 66         | 16.5                      |
|                  |        |         |           |        | 0.167       | 10.7                       | 71.2                        | 4559.3                       | 64         | 16.0                      |
|                  |        |         |           |        | 0.177       | 9.0                        | 60.7                        | 3094.5                       | 51         | 12.8                      |
| 6                | 1.10   | 0.92    | 0.94      | 0.74   | 0.252       | 14.4                       | 48.0                        | 2737.3                       | 57         | 14.3                      |
|                  |        |         |           |        | 0.178       | 10.2                       | 52.5                        | 2989.8                       | 57         | 14.3                      |
|                  |        |         |           |        | 0.177       | 11.1                       | 61.6                        | 3883.0                       | 63         | 15.8                      |
|                  |        |         |           |        | 0.211       | 15.4                       | 56.0                        | 4087.2                       | 73         | 18.3                      |
| 7                | 1.11   | 0.95    | 0.95      | 0.80   | 0.224       | 16.3                       | 57.0                        | 4163.8                       | 73         | 18.3                      |
|                  |        |         |           |        | 0.189       | 12.5                       | 45.2                        | 2981.6                       | 66         | 16.5                      |
|                  |        |         |           |        | 0.216       | 14.7                       | 50.6                        | 3440.1                       | 68         | 17.0                      |
| 8                | 1.19   | 1.03    | 1.03      | 0.93   | 0.243       | 16.7                       | 48.2                        | 3324.3                       | 69         | 17.3                      |
|                  |        |         |           |        | 0.225       | 15.9                       | 38.5                        | 2730.2                       | 71         | 17.8                      |
|                  |        |         |           |        | 0.220       | 14.8                       | 31.1                        | 2083.7                       | 67         | 16.8                      |
|                  |        |         |           |        | 0.163       | 10.8                       | 47.7                        | 3150.6                       | 66         | 16.5                      |
| 9                | 1.51   | 1.30    | 1.29      | 1.00   | 0.131       | 7.6                        | 38.7                        | 2246.9                       | 58         | 14.5                      |
|                  |        |         |           |        | 0.204       | 9.6                        | 31.0                        | 1455.2                       | 47         | 11.8                      |
|                  |        |         |           |        | 0.199       | 7.4                        | 26.6                        | 984.5                        | 37         | 9.3                       |
| 10               | 1.70   | 1.22    | 1.18      | 0.94   | 0.233       | 9.1                        | 24.4                        | 951.3                        | 39         | 9.8                       |
|                  |        |         |           |        | 0.244       | 5.4                        | 39.2                        | 863.1                        | 22         | 5.5                       |
|                  |        |         |           |        | 0.149       | 6.4                        | 41.1                        | 1765.4                       | 43         | 10.8                      |
|                  |        |         |           |        | 0.146       | 6.5                        | 36.5                        | 1642.7                       | 45         | 11.3                      |
| 11               | 1.26   | 1.15    | 1.16      | 0.95   | 0.128       | 5.4                        | 43.7                        | 1835.8                       | 42         | 10.5                      |
|                  |        |         |           |        | 0.125       | 5.6                        | 47.8                        | 2153.1                       | 45         | 11.3                      |
|                  |        |         |           |        | 0.090       | 3.7                        | 44.3                        | 1815.9                       | 41         | 10.3                      |
|                  |        |         |           |        | 0.076       | 2.6                        | 20.8                        | 708.4                        | 34         | 8.5                       |
| 12               | 1.22   | 1.09    | 1.08      | 1.02   | 0.076       | 2.5                        | 22.3                        | 737.3                        | 33         | 8.2                       |
|                  |        |         |           |        | 0.075       | 1.9                        | 25.6                        | 639.0                        | 25         | 6.3                       |
|                  |        |         |           |        | 0.123       | 3.4                        | 29.6                        | 828.4                        | 28         | 7.0                       |

**Supplementary Table S7. PET and MRI data from Patient 7**

| Slice            | SUVmax | SUVmean | SUVmedian | SUVmin | FF mean (%) | FF cum (%mm <sup>3</sup> ) | R2* mean (s <sup>-1</sup> ) | R2* cum (mm <sup>3</sup> /s) | Voxels (N) | Volume (mm <sup>3</sup> ) |
|------------------|--------|---------|-----------|--------|-------------|----------------------------|-----------------------------|------------------------------|------------|---------------------------|
| 1                | 2.7    | 2.07    | 2.11      | 1.28   | 0.169       | 13.3                       | 55.4                        | 4376.6                       | 79         | 19.8                      |
|                  |        |         |           |        | 0.157       | 14.4                       | 52.3                        | 4808.0                       | 92         | 23.0                      |
|                  |        |         |           |        | 0.156       | 14.8                       | 47.6                        | 4519.5                       | 95         | 23.8                      |
| 2                | 2.93   | 2.31    | 2.3       | 1.7    | 0.141       | 12.7                       | 55.4                        | 4986.3                       | 90         | 22.5                      |
|                  |        |         |           |        | 0.146       | 12.2                       | 54.2                        | 4498.4                       | 83         | 20.8                      |
|                  |        |         |           |        | 0.181       | 15.4                       | 64.3                        | 5464.5                       | 85         | 21.3                      |
| 3                | 3.06   | 2.5     | 2.52      | 1.66   | 0.221       | 19.0                       | 59.8                        | 5139.3                       | 86         | 21.5                      |
|                  |        |         |           |        | 0.218       | 27.4                       | 54.0                        | 6803.2                       | 126        | 31.5                      |
|                  |        |         |           |        | 0.233       | 30.8                       | 54.7                        | 7217.9                       | 132        | 33.0                      |
| 4                | 3.06   | 2.39    | 2.27      | 1.66   | 0.232       | 29.2                       | 57.8                        | 7284.2                       | 126        | 31.5                      |
|                  |        |         |           |        | 0.225       | 26.7                       | 52.4                        | 6234.7                       | 119        | 29.8                      |
|                  |        |         |           |        | 0.212       | 25.0                       | 53.1                        | 6268.4                       | 118        | 29.5                      |
| 5                | 2.82   | 2.31    | 2.25      | 1.87   | 0.218       | 29.4                       | 54.8                        | 7394.6                       | 135        | 33.8                      |
|                  |        |         |           |        | 0.244       | 32.2                       | 67.1                        | 8857.7                       | 132        | 33.0                      |
|                  |        |         |           |        | 0.262       | 32.5                       | 65.4                        | 8111.2                       | 124        | 31.0                      |
| 6<br>bifurcation | 2.21   | 1.78    | 1.81      | 1.37   | 0.267       | 23.5                       | 64.2                        | 5646.8                       | 88         | 22.0                      |
|                  |        |         |           |        | 0.237       | 21.3                       | 46.5                        | 4182.7                       | 90         | 22.5                      |
|                  |        |         |           |        | 0.246       | 26.5                       | 45.7                        | 4930.7                       | 108        | 27.0                      |
| 7                | 2.18   | 1.85    | 1.84      | 1.22   | 0.267       | 36.8                       | 44.7                        | 6169.9                       | 138        | 34.5                      |
|                  |        |         |           |        | 0.282       | 39.2                       | 46.9                        | 6516.8                       | 139        | 34.8                      |
|                  |        |         |           |        | 0.293       | 38.7                       | 45.0                        | 5943.0                       | 132        | 33.0                      |
| 8                | 2.13   | 1.89    | 1.9       | 1.64   | 0.288       | 38.0                       | 44.1                        | 5823.9                       | 132        | 33.0                      |
|                  |        |         |           |        | 0.294       | 36.5                       | 45.2                        | 5604.0                       | 124        | 31.0                      |
|                  |        |         |           |        | 0.327       | 33.7                       | 44.6                        | 4595.2                       | 103        | 25.8                      |
| 9                | 2.14   | 1.97    | 1.96      | 1.78   | 0.318       | 33.4                       | 45.0                        | 4725.8                       | 105        | 26.3                      |
|                  |        |         |           |        | 0.280       | 26.3                       | 60.5                        | 5683.4                       | 94         | 23.5                      |
|                  |        |         |           |        | 0.225       | 19.3                       | 57.3                        | 4923.6                       | 86         | 21.5                      |
| 10               | 2.57   | 2.1     | 2.06      | 1.78   | 0.185       | 15.4                       | 55.5                        | 4607.0                       | 83         | 20.8                      |
|                  |        |         |           |        | 0.195       | 14.1                       | 51.1                        | 3680.2                       | 72         | 18.0                      |
|                  |        |         |           |        | 0.207       | 12.4                       | 46.3                        | 2778.5                       | 60         | 15.0                      |
| 11               | 2.62   | 2.21    | 2.21      | 1.98   | 0.208       | 12.5                       | 36.5                        | 2192.5                       | 60         | 15.0                      |
|                  |        |         |           |        | 0.249       | 14.4                       | 26.5                        | 1536.8                       | 58         | 14.5                      |
|                  |        |         |           |        | 0.251       | 13.8                       | 30.5                        | 1676.9                       | 55         | 13.8                      |
| 12               | 2.2    | 1.97    | 1.94      | 1.8    | 0.264       | 14.8                       | 51.1                        | 2864.0                       | 56         | 14.0                      |
|                  |        |         |           |        | 0.243       | 13.9                       | 59.3                        | 3380.8                       | 57         | 14.3                      |
|                  |        |         |           |        | 0.228       | 13.0                       | 81.1                        | 4620.6                       | 57         | 14.3                      |
| 13               | 2.2    | 1.86    | 1.88      | 1.6    | 0.272       | 18.5                       | 59.9                        | 4073.7                       | 68         | 17.0                      |
|                  |        |         |           |        | 0.269       | 18.8                       | 50.6                        | 3541.7                       | 70         | 17.5                      |
|                  |        |         |           |        | 0.272       | 18.5                       | 45.3                        | 3078.9                       | 68         | 17.0                      |
| 14               | 2.66   | 2.03    | 1.99      | 1.66   | 0.261       | 9.7                        | 46.4                        | 1718.6                       | 37         | 9.2                       |
|                  |        |         |           |        | 0.274       | 11.0                       | 46.5                        | 1858.6                       | 40         | 10.0                      |
|                  |        |         |           |        | 0.290       | 11.3                       | 45.5                        | 1774.5                       | 39         | 9.8                       |
| 15               | 2.78   | 2       | 1.89      | 1.51   | 0.269       | 12.7                       | 52.2                        | 2454.6                       | 47         | 11.8                      |
|                  |        |         |           |        | 0.222       | 12.2                       | 42.7                        | 2347.4                       | 55         | 13.8                      |
|                  |        |         |           |        | 0.195       | 9.3                        | 40.1                        | 1927.0                       | 48         | 12.0                      |



**Supplementary Table S8. PET and MRI data from Patient 8**

| Slice            | SUVmax | SUVmean | SUVmedian | SUVmin | FF mean (%) | FF cum (%mm <sup>3</sup> ) | R2* mean (s <sup>-1</sup> ) | R2* cum (mm <sup>3</sup> /s) | Voxels (N) | Volume (mm <sup>3</sup> ) |
|------------------|--------|---------|-----------|--------|-------------|----------------------------|-----------------------------|------------------------------|------------|---------------------------|
| 1                | 2.24   | 1.98    | 2.01      | 1.37   | 0.120       | 4.8                        | 58.9                        | 2356.7                       | 40         | 10.0                      |
|                  |        |         |           |        | 0.135       | 7.2                        | 76.7                        | 4064.6                       | 53         | 13.3                      |
| 2                | 2.23   | 1.89    | 1.88      | 1.54   | 0.170       | 8.7                        | 78.1                        | 3984.3                       | 51         | 12.8                      |
|                  |        |         |           |        | 0.252       | 6.8                        | 98.5                        | 2659.7                       | 27         | 6.8                       |
|                  |        |         |           |        | 0.325       | 9.1                        | 98.6                        | 2761.5                       | 28         | 7.0                       |
|                  |        |         |           |        | 0.291       | 9.3                        | 90.5                        | 2895.6                       | 32         | 8.0                       |
| 3                | 2.39   | 1.91    | 1.94      | 1.38   | 0.270       | 11.9                       | 54.0                        | 2377.3                       | 44         | 11.0                      |
|                  |        |         |           |        | 0.314       | 13.8                       | 42.3                        | 1859.6                       | 44         | 11.0                      |
|                  |        |         |           |        | 0.324       | 13.0                       | 52.0                        | 2078.5                       | 40         | 10.0                      |
| 4                | 2.23   | 1.98    | 1.97      | 1.53   | 0.269       | 13.7                       | 52.4                        | 2673.8                       | 51         | 12.8                      |
|                  |        |         |           |        | 0.290       | 13.3                       | 51.6                        | 2375.1                       | 46         | 11.5                      |
|                  |        |         |           |        | 0.252       | 11.8                       | 50.7                        | 2381.5                       | 47         | 11.8                      |
|                  |        |         |           |        | 0.271       | 12.2                       | 44.2                        | 1990.5                       | 45         | 11.3                      |
| 5                | 2.16   | 1.96    | 1.94      | 1.69   | 0.318       | 14.9                       | 41.6                        | 1957.2                       | 47         | 11.8                      |
|                  |        |         |           |        | 0.194       | 10.8                       | 43.9                        | 2459.4                       | 56         | 14.0                      |
|                  |        |         |           |        | 0.217       | 13.0                       | 54.3                        | 3259.2                       | 60         | 15.0                      |
|                  |        |         |           |        | 0.225       | 11.9                       | 51.6                        | 2735.4                       | 53         | 13.3                      |
| 6<br>bifurcation | 2.29   | 1.70    | 1.68      | 0.99   | 0.147       | 10.3                       | 58.0                        | 4062.6                       | 70         | 17.5                      |
|                  |        |         |           |        | 0.129       | 9.1                        | 76.8                        | 5452.4                       | 71         | 17.8                      |
|                  |        |         |           |        | 0.107       | 6.7                        | 70.3                        | 4359.9                       | 62         | 15.5                      |
|                  |        |         |           |        | 0.083       | 5.0                        | 69.1                        | 4148.0                       | 60         | 15.0                      |
| 7                | 2.28   | 1.66    | 1.62      | 1.43   | 0.073       | 4.5                        | 86.6                        | 5370.8                       | 62         | 15.5                      |
|                  |        |         |           |        | 0.059       | 5.5                        | 73.7                        | 6931.9                       | 94         | 23.5                      |
|                  |        |         |           |        | 0.052       | 5.5                        | 68.1                        | 7221.6                       | 106        | 26.5                      |
|                  |        |         |           |        | 0.044       | 4.3                        | 60.4                        | 5919.3                       | 98         | 24.5                      |
| 8                | 3.10   | 1.93    | 1.90      | 1.29   | 0.075       | 6.4                        | 63.2                        | 5373.0                       | 85         | 21.3                      |
|                  |        |         |           |        | 0.080       | 7.0                        | 79.1                        | 6881.5                       | 87         | 21.8                      |
|                  |        |         |           |        | 0.101       | 9.7                        | 74.9                        | 7186.4                       | 96         | 24.0                      |
| 9                | 2.84   | 2.01    | 1.98      | 1.39   | 0.081       | 8.5                        | 76.8                        | 8058.8                       | 105        | 26.3                      |
|                  |        |         |           |        | 0.068       | 6.8                        | 75.8                        | 7501.9                       | 99         | 24.8                      |
|                  |        |         |           |        | 0.048       | 3.4                        | 53.1                        | 3772.9                       | 71         | 17.8                      |
|                  |        |         |           |        | 0.047       | 3.2                        | 52.9                        | 3543.4                       | 67         | 16.8                      |
| 10               | 2.73   | 2.02    | 2.02      | 1.56   | 0.040       | 2.6                        | 43.2                        | 2805.1                       | 65         | 16.3                      |
|                  |        |         |           |        | 0.036       | 2.6                        | 42.8                        | 3082.0                       | 72         | 18.0                      |
|                  |        |         |           |        | 0.044       | 3.0                        | 41.9                        | 2894.4                       | 69         | 17.3                      |
| 11               | 2.31   | 1.89    | 1.77      | 1.57   | 0.020       | 0.6                        | 53.8                        | 1613.9                       | 30         | 7.5                       |
|                  |        |         |           |        | 0.042       | 1.4                        | 39.0                        | 1285.9                       | 33         | 8.3                       |
|                  |        |         |           |        | 0.045       | 1.7                        | 36.8                        | 1359.9                       | 37         | 9.2                       |
|                  |        |         |           |        | 0.079       | 3.5                        | 56.6                        | 2547.4                       | 45         | 11.3                      |
| 12               | 2.19   | 1.89    | 1.85      | 1.52   | 0.097       | 4.4                        | 56.8                        | 2555.6                       | 45         | 11.3                      |
|                  |        |         |           |        | 0.122       | 5.1                        | 58.3                        | 2450.1                       | 42         | 10.5                      |

### Supplementary Table S9. PET and MRI data from Patient 9

| Slice             | SUVmax | SUVmean | SUVmedian | SUVmin | FF mean (%) | FF cum (%mm <sup>3</sup> ) | R2* mean (s <sup>-1</sup> ) | R2* cum (mm <sup>3</sup> /s) | Voxels (N) | Volume (mm <sup>3</sup> ) |
|-------------------|--------|---------|-----------|--------|-------------|----------------------------|-----------------------------|------------------------------|------------|---------------------------|
| 1                 | 2.73   | 1.96    | 2.01      | 1.25   | 0.168       | 13.2                       | 33.1                        | 2612.0                       | 79         | 19.8                      |
|                   |        |         |           |        | 0.157       | 10.5                       | 26.0                        | 1739.4                       | 67         | 16.8                      |
|                   |        |         |           |        | 0.166       | 10.4                       | 26.8                        | 1689.7                       | 63         | 15.8                      |
| 2                 | 2.74   | 2.42    | 2.44      | 1.89   | 0.157       | 8.8                        | 28.2                        | 1576.7                       | 56         | 14.0                      |
|                   |        |         |           |        | 0.151       | 8.1                        | 27.9                        | 1505.8                       | 54         | 13.5                      |
|                   |        |         |           |        | 0.152       | 9.8                        | 22.7                        | 1452.5                       | 64         | 16.0                      |
| 3                 | 2.89   | 2.36    | 2.37      | 1.48   | 0.152       | 9.3                        | 26.2                        | 1598.4                       | 61         | 15.3                      |
|                   |        |         |           |        | 0.177       | 11.1                       | 23.8                        | 1498.9                       | 63         | 15.8                      |
|                   |        |         |           |        | 0.172       | 12.1                       | 19.8                        | 1383.9                       | 70         | 17.5                      |
| 4                 | 2.76   | 2.19    | 2.21      | 1.46   | 0.158       | 9.1                        | 16.4                        | 952.5                        | 58         | 14.5                      |
|                   |        |         |           |        | 0.167       | 7.7                        | 10.4                        | 476.9                        | 46         | 11.5                      |
|                   |        |         |           |        | 0.146       | 7.7                        | 22.7                        | 1201.7                       | 53         | 13.3                      |
| 5                 | 2.92   | 2.11    | 2.09      | 1.46   | 0.121       | 8.1                        | 21.0                        | 1410.0                       | 67         | 16.8                      |
|                   |        |         |           |        | 0.122       | 9.3                        | 18.2                        | 1386.9                       | 76         | 19.0                      |
|                   |        |         |           |        | 0.121       | 10.3                       | 17.8                        | 1510.1                       | 85         | 21.3                      |
| 6                 | 2.92   | 2.27    | 2.24      | 1.61   | 0.159       | 20.3                       | 30.9                        | 3949.0                       | 128        | 32.0                      |
|                   |        |         |           |        | 0.158       | 20.6                       | 34.8                        | 4518.7                       | 130        | 32.5                      |
|                   |        |         |           |        | 0.160       | 21.7                       | 39.1                        | 5318.7                       | 136        | 34.0                      |
| 7                 | 2.77   | 2.15    | 2.18      | 1.52   | 0.141       | 15.4                       | 30.2                        | 3290.4                       | 109        | 27.3                      |
|                   |        |         |           |        | 0.129       | 13.8                       | 30.0                        | 3214.4                       | 107        | 26.8                      |
|                   |        |         |           |        | 0.157       | 15.2                       | 39.1                        | 3794.4                       | 97         | 24.3                      |
| 8                 | 2.6    | 2.04    | 2.07      | 1.49   | 0.184       | 16.2                       | 44.0                        | 3869.4                       | 88         | 22.0                      |
|                   |        |         |           |        | 0.185       | 17.0                       | 45.7                        | 4202.2                       | 92         | 23.0                      |
|                   |        |         |           |        | 0.148       | 29.4                       | 39.1                        | 7744.3                       | 198        | 49.5                      |
| 9                 | 2.29   | 1.85    | 1.93      | 1.38   | 0.154       | 32.9                       | 35.8                        | 7663.3                       | 214        | 53.5                      |
|                   |        |         |           |        | 0.143       | 26.6                       | 36.9                        | 6855.4                       | 186        | 46.5                      |
|                   |        |         |           |        | 0.095       | 11.0                       | 27.8                        | 3227.7                       | 116        | 29.0                      |
| 10<br>bifurcation | 2.61   | 2.08    | 2         | 1.69   | 0.091       | 10.5                       | 29.4                        | 3386.7                       | 115        | 28.7                      |
|                   |        |         |           |        | 0.102       | 8.8                        | 33.9                        | 2914.3                       | 86         | 21.5                      |
|                   |        |         |           |        | 0.137       | 11.5                       | 36.2                        | 3036.9                       | 84         | 21.0                      |
| 11                | 2.73   | 2.22    | 2.28      | 1.61   | 0.178       | 15.2                       | 42.6                        | 3616.9                       | 85         | 21.3                      |
|                   |        |         |           |        | 0.110       | 13.2                       | 46.4                        | 5568.8                       | 120        | 30.0                      |
|                   |        |         |           |        | 0.153       | 18.9                       | 31.2                        | 3864.4                       | 124        | 31.0                      |
| 12                | 2.14   | 1.25    | 1.16      | 0.72   | 0.151       | 16.5                       | 32.9                        | 3589.6                       | 109        | 27.3                      |
|                   |        |         |           |        | 0.178       | 12.8                       | 46.1                        | 3320.7                       | 72         | 18.0                      |
|                   |        |         |           |        | 0.243       | 17.5                       | 42.5                        | 3060.1                       | 72         | 18.0                      |
| 13                | 1.97   | 1.32    | 1.33      | 0.77   | 0.223       | 11.8                       | 34.4                        | 1820.8                       | 53         | 13.3                      |
|                   |        |         |           |        | 0.177       | 15.4                       | 44.2                        | 3845.0                       | 87         | 21.8                      |
|                   |        |         |           |        | 0.184       | 14.5                       | 43.5                        | 3434.5                       | 79         | 19.8                      |
| 14                | 1.82   | 1.25    | 1.26      | 0.58   | 0.199       | 14.9                       | 53.2                        | 3989.7                       | 75         | 18.8                      |
|                   |        |         |           |        | 0.146       | 12.0                       | 43.5                        | 3566.6                       | 82         | 20.5                      |
|                   |        |         |           |        | 0.151       | 11.9                       | 37.3                        | 2949.0                       | 79         | 19.8                      |
| 15                | 1.62   | 1.27    | 1.27      | 0.93   | 0.169       | 12.7                       | 36.6                        | 2743.5                       | 75         | 18.8                      |
|                   |        |         |           |        | 0.173       | 13.4                       | 42.8                        | 3291.9                       | 77         | 19.3                      |
|                   |        |         |           |        | 0.164       | 9.8                        | 48.0                        | 2878.0                       | 60         | 15.0                      |
| 16                | 1.57   | 1.37    | 1.37      | 1.09   | 0.119       | 4.8                        | 37.7                        | 1507.6                       | 40         | 10.0                      |

### Supplementary Table S10. PET and MRI data from Patient 10

| Slice            | SUVmax | SUVmean | SUVmedian | SUVmin | FF mean (%) | FF cum (%mm <sup>3</sup> ) | R2* mean (s <sup>-1</sup> ) | R2* cum (mm <sup>3</sup> /s) | Voxels (N) | Volume (mm <sup>3</sup> ) |
|------------------|--------|---------|-----------|--------|-------------|----------------------------|-----------------------------|------------------------------|------------|---------------------------|
| 1                | 2.33   | 1.83    | 1.88      | 1.08   | 0.100       | 9.1                        | 17.7                        | 1611.9                       | 91         | 22.8                      |
|                  |        |         |           |        | 0.066       | 6.1                        | 26.9                        | 2500.3                       | 93         | 23.2                      |
|                  |        |         |           |        | 0.083       | 9.0                        | 33.0                        | 3562.7                       | 108        | 27.0                      |
|                  |        |         |           |        | 0.088       | 9.8                        | 33.1                        | 3706.1                       | 112        | 28.0                      |
| 2                | 2.43   | 1.81    | 1.84      | 1.23   | 0.093       | 8.9                        | 33.5                        | 3185.8                       | 95         | 23.8                      |
|                  |        |         |           |        | 0.094       | 8.8                        | 31.1                        | 2923.3                       | 94         | 23.5                      |
|                  |        |         |           |        | 0.116       | 10.7                       | 38.5                        | 3583.7                       | 93         | 23.3                      |
| 3                | 2.43   | 2.02    | 2.07      | 1.31   | 0.116       | 11.1                       | 43.0                        | 4085.0                       | 95         | 23.8                      |
|                  |        |         |           |        | 0.114       | 11.3                       | 38.6                        | 3824.3                       | 99         | 24.8                      |
|                  |        |         |           |        | 0.106       | 9.4                        | 37.6                        | 3344.1                       | 89         | 22.3                      |
|                  |        |         |           |        | 0.101       | 7.7                        | 31.9                        | 2425.4                       | 76         | 19.0                      |
| 4                | 2.44   | 2.01    | 1.99      | 1.25   | 0.114       | 8.4                        | 37.4                        | 2764.0                       | 74         | 18.5                      |
|                  |        |         |           |        | 0.094       | 8.3                        | 24.8                        | 2184.3                       | 88         | 22.0                      |
|                  |        |         |           |        | 0.059       | 5.4                        | 33.2                        | 3054.0                       | 92         | 23.0                      |
| 5                | 2.09   | 1.72    | 1.75      | 1.19   | 0.072       | 7.6                        | 50.0                        | 5250.3                       | 105        | 26.3                      |
|                  |        |         |           |        | 0.154       | 18.4                       | 55.9                        | 6657.1                       | 119        | 29.8                      |
|                  |        |         |           |        | 0.148       | 17.0                       | 55.7                        | 6400.5                       | 115        | 28.8                      |
|                  |        |         |           |        | 0.137       | 15.0                       | 63.7                        | 7007.6                       | 110        | 27.5                      |
| 6                | 3.11   | 1.92    | 1.91      | 1.40   | 0.145       | 19.1                       | 67.2                        | 8806.3                       | 131        | 32.8                      |
|                  |        |         |           |        | 0.127       | 15.7                       | 66.5                        | 8181.5                       | 123        | 30.8                      |
|                  |        |         |           |        | 0.178       | 23.4                       | 69.4                        | 9161.2                       | 132        | 33.0                      |
|                  |        |         |           |        | 0.160       | 23.1                       | 82.8                        | 11925.5                      | 144        | 36.0                      |
| 7<br>bifurcation | 2.46   | 2.19    | 2.24      | 1.53   | 0.125       | 17.9                       | 89.1                        | 12830.8                      | 144        | 36.0                      |
|                  |        |         |           |        | 0.067       | 8.2                        | 48.8                        | 5949.9                       | 122        | 30.5                      |
|                  |        |         |           |        | 0.090       | 11.1                       | 39.5                        | 4858.3                       | 123        | 30.8                      |
| 8                | 2.59   | 1.97    | 2.05      | 1.18   | 0.096       | 11.2                       | 37.7                        | 4369.5                       | 116        | 29.0                      |
|                  |        |         |           |        | 0.056       | 5.5                        | 27.3                        | 2675.9                       | 98         | 24.5                      |
|                  |        |         |           |        | 0.066       | 6.3                        | 23.6                        | 2270.2                       | 96         | 24.0                      |
| 9                | 2.53   | 1.81    | 1.77      | 1.41   | 0.066       | 6.4                        | 22.8                        | 2214.5                       | 97         | 24.3                      |
|                  |        |         |           |        | 0.069       | 6.9                        | 22.9                        | 2262.2                       | 99         | 24.8                      |
|                  |        |         |           |        | 0.081       | 7.0                        | 31.3                        | 2725.2                       | 87         | 21.8                      |

**Supplementary Table S11. PET and MRI data from Patient 11**

| Slice            | SUVmax | SUVmean | SUVmedian | SUVmin | FF mean (%) | FF cum (%mm <sup>3</sup> ) | R2* mean (s <sup>-1</sup> ) | R2* cum (mm <sup>3</sup> /s) | Voxels (N) | Volume (mm <sup>3</sup> ) |
|------------------|--------|---------|-----------|--------|-------------|----------------------------|-----------------------------|------------------------------|------------|---------------------------|
| 1                | 2.26   | 1.93    | 1.92      | 1.55   | 0.075       | 6.1                        | 43.9                        | 3589.8                       | 82         | 20.4                      |
|                  |        |         |           |        | 0.075       | 7.8                        | 34.5                        | 3589.8                       | 104        | 26.0                      |
| 2                | 2.14   | 1.69    | 1.7       | 1.15   | 0.072       | 7.2                        | 34.8                        | 3477.4                       | 100        | 25.0                      |
|                  |        |         |           |        | 0.078       | 6.4                        | 56.6                        | 4641.3                       | 82         | 20.5                      |
|                  |        |         |           |        | 0.126       | 10.6                       | 64.1                        | 5383.1                       | 84         | 21.0                      |
|                  |        |         |           |        | 0.173       | 18.6                       | 63.3                        | 6841.7                       | 108        | 27.0                      |
|                  |        |         |           |        | 0.161       | 19.8                       | 54.4                        | 6693.0                       | 123        | 30.8                      |
| 3                | 2.03   | 1.66    | 1.66      | 1.26   | 0.129       | 16.5                       | 57.2                        | 7316.9                       | 128        | 32.0                      |
|                  |        |         |           |        | 0.103       | 12.5                       | 59.9                        | 7241.9                       | 121        | 30.3                      |
|                  |        |         |           |        | 0.132       | 16.6                       | 60.7                        | 7652.3                       | 126        | 31.5                      |
|                  |        |         |           |        | 0.171       | 20.6                       | 62.4                        | 7553.1                       | 121        | 30.3                      |
| 4<br>bifurcation | 2.33   | 1.92    | 1.91      | 1.33   | 0.136       | 14.9                       | 60.6                        | 6666.7                       | 110        | 27.5                      |
|                  |        |         |           |        | 0.150       | 15.5                       | 72.1                        | 7425.1                       | 103        | 25.8                      |
|                  |        |         |           |        | 0.152       | 11.1                       | 70.3                        | 5129.2                       | 73         | 18.3                      |
| 5                | 3.32   | 2.02    | 2         | 1.17   | 0.109       | 7.0                        | 79.5                        | 5087.7                       | 64         | 16.0                      |
|                  |        |         |           |        | 0.082       | 5.3                        | 56.6                        | 3680.1                       | 65         | 16.3                      |
|                  |        |         |           |        | 0.058       | 2.5                        | 34.7                        | 1525.6                       | 44         | 11.0                      |
|                  |        |         |           |        | 0.043       | 1.7                        | 35.2                        | 1407.0                       | 40         | 10.0                      |
| 6                | 3.32   | 1.89    | 1.81      | 0.91   | 0.074       | 2.4                        | 59.9                        | 1976.0                       | 33         | 8.3                       |
|                  |        |         |           |        | 0.110       | 3.0                        | 70.1                        | 1892.9                       | 27         | 6.8                       |
|                  |        |         |           |        | 0.032       | 0.7                        | 44.5                        | 1024.1                       | 23         | 5.8                       |
| 7                | 2.55   | 1.61    | 1.65      | 0.91   | 0.133       | 4.0                        | 67.8                        | 2033.7                       | 30         | 7.5                       |
|                  |        |         |           |        | 0.149       | 5.1                        | 90.3                        | 3068.6                       | 34         | 8.5                       |
|                  |        |         |           |        | 0.126       | 3.9                        | 90.6                        | 2807.8                       | 31         | 7.7                       |
|                  |        |         |           |        | 0.172       | 4.1                        | 86.8                        | 2082.6                       | 24         | 6.0                       |
| 8                | 2.06   | 1.67    | 1.65      | 1.1    | 0.137       | 3.4                        | 66.9                        | 1671.6                       | 25         | 6.2                       |
|                  |        |         |           |        | 0.060       | 1.3                        | 53.4                        | 1174.6                       | 22         | 5.5                       |
|                  |        |         |           |        | 0.138       | 6.9                        | 64.8                        | 3239.4                       | 50         | 12.5                      |
| 9                | 2.43   | 1.83    | 1.84      | 1.23   | 0.119       | 5.9                        | 45.0                        | 2251.3                       | 50         | 12.5                      |
|                  |        |         |           |        | 0.095       | 5.8                        | 40.1                        | 2443.3                       | 61         | 15.3                      |
|                  |        |         |           |        | 0.089       | 6.6                        | 39.0                        | 2927.4                       | 75         | 18.8                      |
|                  |        |         |           |        | 0.105       | 7.8                        | 43.0                        | 3184.7                       | 74         | 18.5                      |
| 10               | 2.73   | 2.26    | 2.26      | 1.41   | 0.123       | 9.2                        | 50.8                        | 3812.2                       | 75         | 18.8                      |
|                  |        |         |           |        | 0.130       | 9.7                        | 49.2                        | 3691.1                       | 75         | 18.8                      |
|                  |        |         |           |        | 0.147       | 8.4                        | 50.5                        | 2879.0                       | 57         | 14.3                      |
|                  |        |         |           |        | 0.147       | 8.4                        | 50.5                        | 2879.0                       | 57         | 14.3                      |

**Supplementary Table S12. PET and MRI data from Patient 12**

| Slice            | SUVmax | SUVmean | SUVmedian | SUVmin | FF mean (%) | FF cum (%mm <sup>3</sup> ) | R2* mean (s <sup>-1</sup> ) | R2* cum (mm <sup>3</sup> /s) | Voxels (N) | Volume (mm <sup>3</sup> ) |
|------------------|--------|---------|-----------|--------|-------------|----------------------------|-----------------------------|------------------------------|------------|---------------------------|
| 1                | 2.67   | 1.66    | 1.56      | 1.04   | 0.025       | 0.02                       | 20.9                        | 20.9                         | 1          | 0.3                       |
|                  |        |         |           |        | 0.236       | 13.7                       | 30.7                        | 1781.2                       | 58         | 14.5                      |
|                  |        |         |           |        | 0.205       | 11.7                       | 33.0                        | 1879.1                       | 57         | 14.3                      |
|                  |        |         |           |        | 0.238       | 14.7                       | 44.6                        | 2764.9                       | 62         | 15.5                      |
| 2                | 2.67   | 1.66    | 1.56      | 1.04   | 0.260       | 18.7                       | 59.8                        | 4302.6                       | 72         | 18.0                      |
|                  |        |         |           |        | 0.237       | 17.1                       | 69.8                        | 5027.1                       | 72         | 18.0                      |
|                  |        |         |           |        | 0.263       | 26.3                       | 49.2                        | 4917.3                       | 100        | 25.0                      |
|                  |        |         |           |        | 0.257       | 26.5                       | 47.3                        | 4872.8                       | 103        | 25.8                      |
| 3<br>bifurcation | 2.94   | 1.82    | 1.85      | 1.04   | 0.237       | 25.6                       | 57.1                        | 6162.9                       | 108        | 27.0                      |
|                  |        |         |           |        | 0.251       | 26.7                       | 80.4                        | 8526.7                       | 106        | 26.5                      |
|                  |        |         |           |        | 0.210       | 22.5                       | 75.6                        | 8086.5                       | 107        | 26.8                      |
| 4                | 3.02   | 1.94    | 2.00      | 1.16   | 0.254       | 23.1                       | 63.5                        | 5777.8                       | 91         | 22.8                      |
|                  |        |         |           |        | 0.220       | 20.5                       | 58.0                        | 5391.3                       | 93         | 23.3                      |
|                  |        |         |           |        | 0.219       | 20.4                       | 64.2                        | 5972.9                       | 93         | 23.3                      |
|                  |        |         |           |        | 0.244       | 21.0                       | 61.6                        | 5298.8                       | 86         | 21.5                      |
| 5                | 3.50   | 1.87    | 1.74      | 1.13   | 0.241       | 20.7                       | 66.2                        | 5689.7                       | 86         | 21.5                      |
|                  |        |         |           |        | 0.272       | 23.1                       | 78.4                        | 6667.6                       | 85         | 21.3                      |
|                  |        |         |           |        | 0.233       | 17.7                       | 61.7                        | 4691.7                       | 76         | 19.0                      |
| 6                | 2.74   | 2.22    | 2.08      | 1.75   | 0.213       | 16.4                       | 58.9                        | 4532.5                       | 77         | 19.3                      |
|                  |        |         |           |        | 0.272       | 17.7                       | 50.0                        | 3250.0                       | 65         | 16.3                      |
|                  |        |         |           |        | 0.237       | 16.6                       | 46.8                        | 3273.8                       | 70         | 17.5                      |
|                  |        |         |           |        | 0.259       | 16.8                       | 47.0                        | 3053.5                       | 65         | 16.3                      |
| 7                | 3.10   | 2.24    | 2.08      | 1.75   | 0.234       | 15.4                       | 43.0                        | 2838.0                       | 66         | 16.5                      |
|                  |        |         |           |        | 0.234       | 15.7                       | 38.5                        | 2578.8                       | 67         | 16.8                      |
|                  |        |         |           |        | 0.244       | 14.9                       | 37.9                        | 2312.6                       | 61         | 15.3                      |
| 8                | 3.24   | 2.13    | 2.12      | 1.34   | 0.224       | 16.6                       | 29.8                        | 2207.1                       | 74         | 18.5                      |
|                  |        |         |           |        | 0.254       | 17.8                       | 39.6                        | 2775.4                       | 70         | 17.5                      |
|                  |        |         |           |        | 0.181       | 7.4                        | 53.9                        | 2208.6                       | 41         | 10.3                      |
|                  |        |         |           |        | 0.263       | 11.8                       | 52.3                        | 2354.5                       | 45         | 11.3                      |
| 9                | 3.38   | 2.08    | 2.04      | 1.05   | 0.267       | 9.6                        | 62.1                        | 2235.1                       | 36         | 9.0                       |

**Supplementary Table S13. Pearson correlations for target-to-blood pool ratio/fat fraction and for target-to-blood pool ratio/R2\* in the subgroup with the shortest time delay (lower tertile) and the longest time delay (upper tertile) between qMRI and PET/MRI.**

| Days | Correlations |          | Correlations |          | Subgroup correlations |         |               |
|------|--------------|----------|--------------|----------|-----------------------|---------|---------------|
|      | TBR/FF       | <i>p</i> | TBR/R2*      | <i>p</i> | TBR/FF                | TBR/R2* |               |
| 14   | 0.16         | 0.398    | -0.23        | 0.231    | -0.196                | -0.234  | Lower tertile |
| 18   | -0.39        | 0.011    | -0.60        | 0.000    |                       |         |               |
| 18   | -0.47        | 0.001    | 0.20         | 0.186    |                       |         |               |
| 22   | -0.09        | 0.609    | -0.31        | 0.073    |                       |         |               |
| 24   | -0.12        | 0.538    | 0.12         | 0.506    |                       |         |               |
| 26   | 0.12         | 0.457    | -0.25        | 0.122    | -0.019                | -0.094  | Upper tertile |
| 54   | -0.34        | 0.025    | -0.28        | 0.065    |                       |         |               |
| 91   | -0.48        | 0.001    | -0.18        | 0.257    |                       |         |               |
| 99   | -0.35        | 0.016    | -0.58        | 0.000    |                       |         |               |
| 104  | -0.33        | 0.026    | -0.27        | 0.077    |                       |         |               |
| 160  | 0.70         | 0.000    | 0.14         | 0.371    |                       |         |               |
| 219  | -0.09        | 0.550    | 0.34         | 0.021    |                       |         |               |

In both subgroups there were individuals with either positive or negative correlations, and in both subgroups the correlations were weak regardless of the time delay.

FF, fat fraction; TBR, target-to-blood pool ratio

**Supplementary Figure S1. Fat fraction/R2\* correlations**

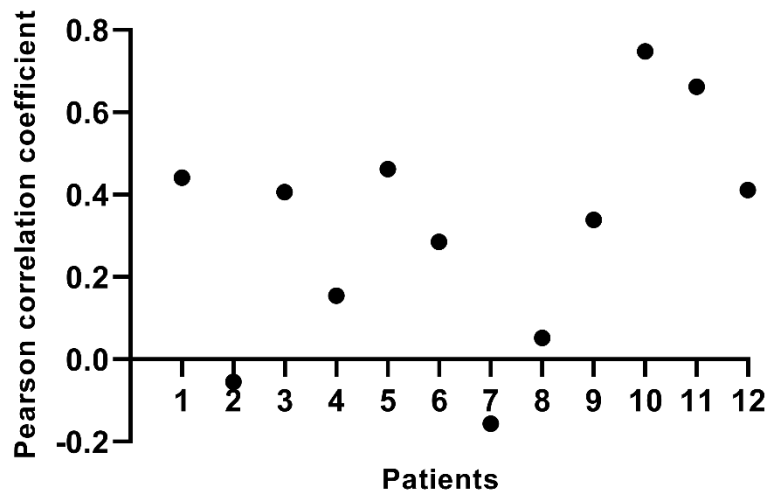

**Suppl Fig S1** Pearson correlation coefficients between mean fat fraction and mean R2\* for each patient.

FF, fat fraction.

**Supplementary Figure S2. Pearson correlations for target-to-blood pool ratio/fat fraction and for target-to-blood pool ratio/R2\* sorted by the number of days between qMRI and PET/MRI**

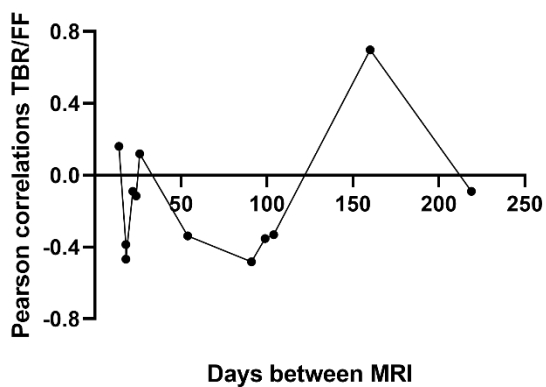

**a**

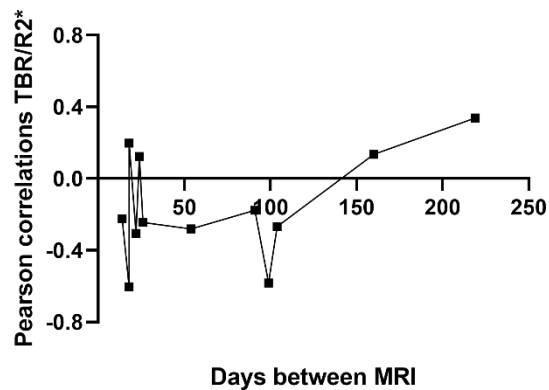

**b**

**Suppl Fig S2** (a) Correlation data for TBR/FF from all 12 patients, sorted by number of days between investigations (b) Correlation data for TBR/R2\* from all 12 patients, sorted by number of days between investigations. The plots show no evidence that the correlations between TBR/FF and TBR/R2\* were influenced by the length of time between qMRI and PET/MRI.

FF, fat fraction; MRI, Magnetic Resonance Imaging; qMRI, quantitative Magnetic Resonance Imaging; TBR, target-to-blood pool ratio



**Supplementary Figure S3. Correlation plots for target-to-blood pool ratio/fat fraction and for target-to-blood pool ratio/R2\* in the subgroup with the shortest time delay (lower tertile) and the longest time delay (upper tertile) between qMRI and PET/MRI**

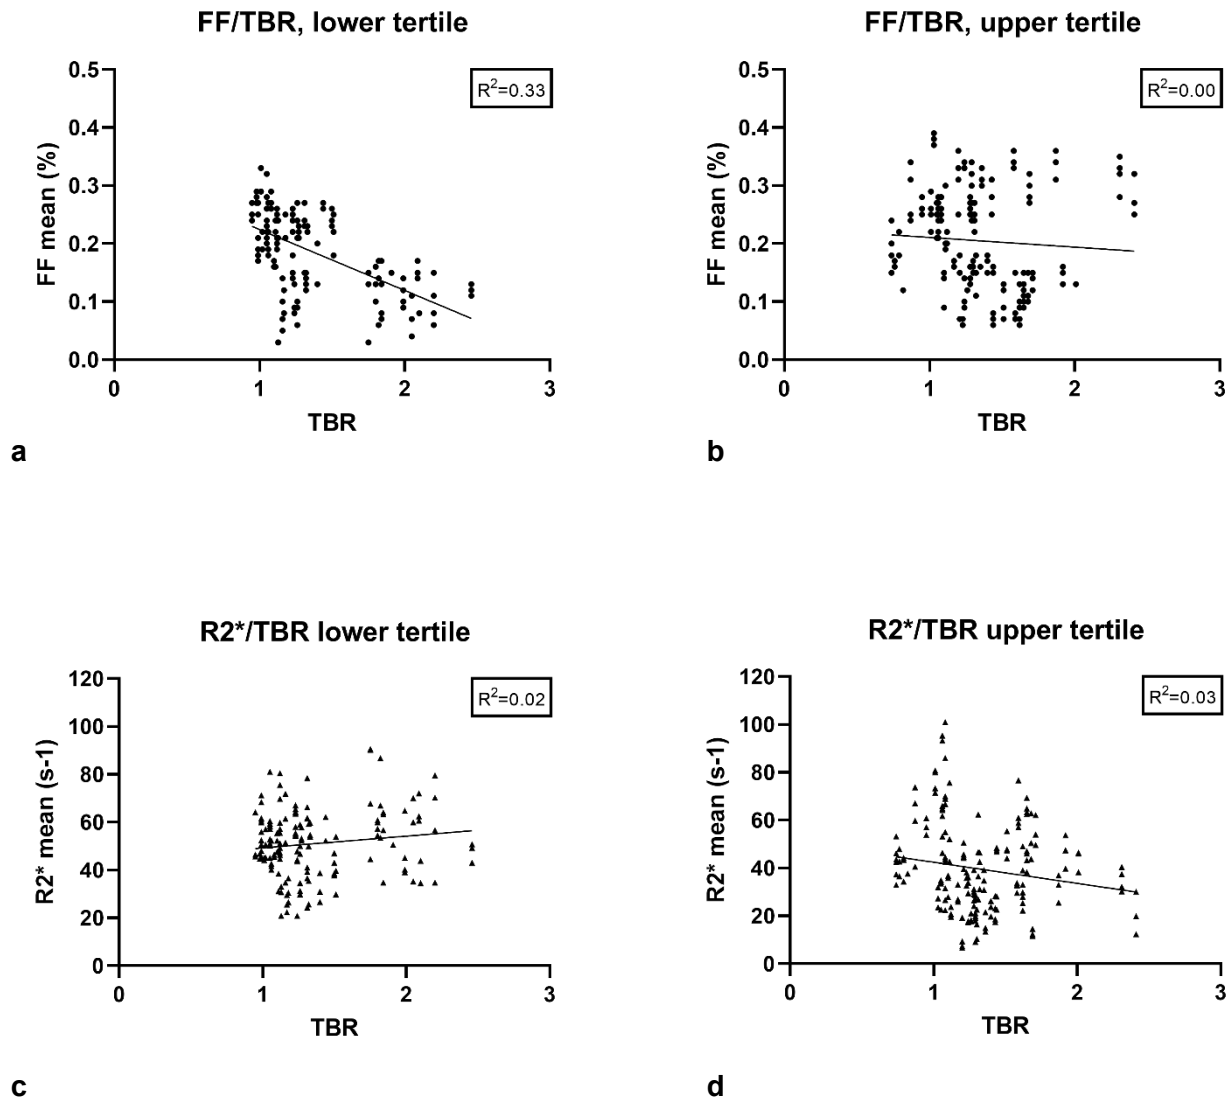

**Suppl Fig S3** Linear regressions based on all plaque values from all patients within the lower respectively upper tertile. No positive correlation was found between FF/TBR nor R2\*/TBR, regardless of the time delay between qMRI and PET/MRI. Simple linear regression was performed using GraphPad Prism version 9.0.0 for Windows, GraphPad Software, San Diego, California USA, [www.graphpad.com](http://www.graphpad.com).

FF, fat fraction; PET, Positron Emission Tomography, qMRI, quantitative Magnetic Resonance Imaging; TBR, target-to-blood pool ratio

Supplementary Figure S4. Correlation plots for mean FF/R2\* and TBR, all patients

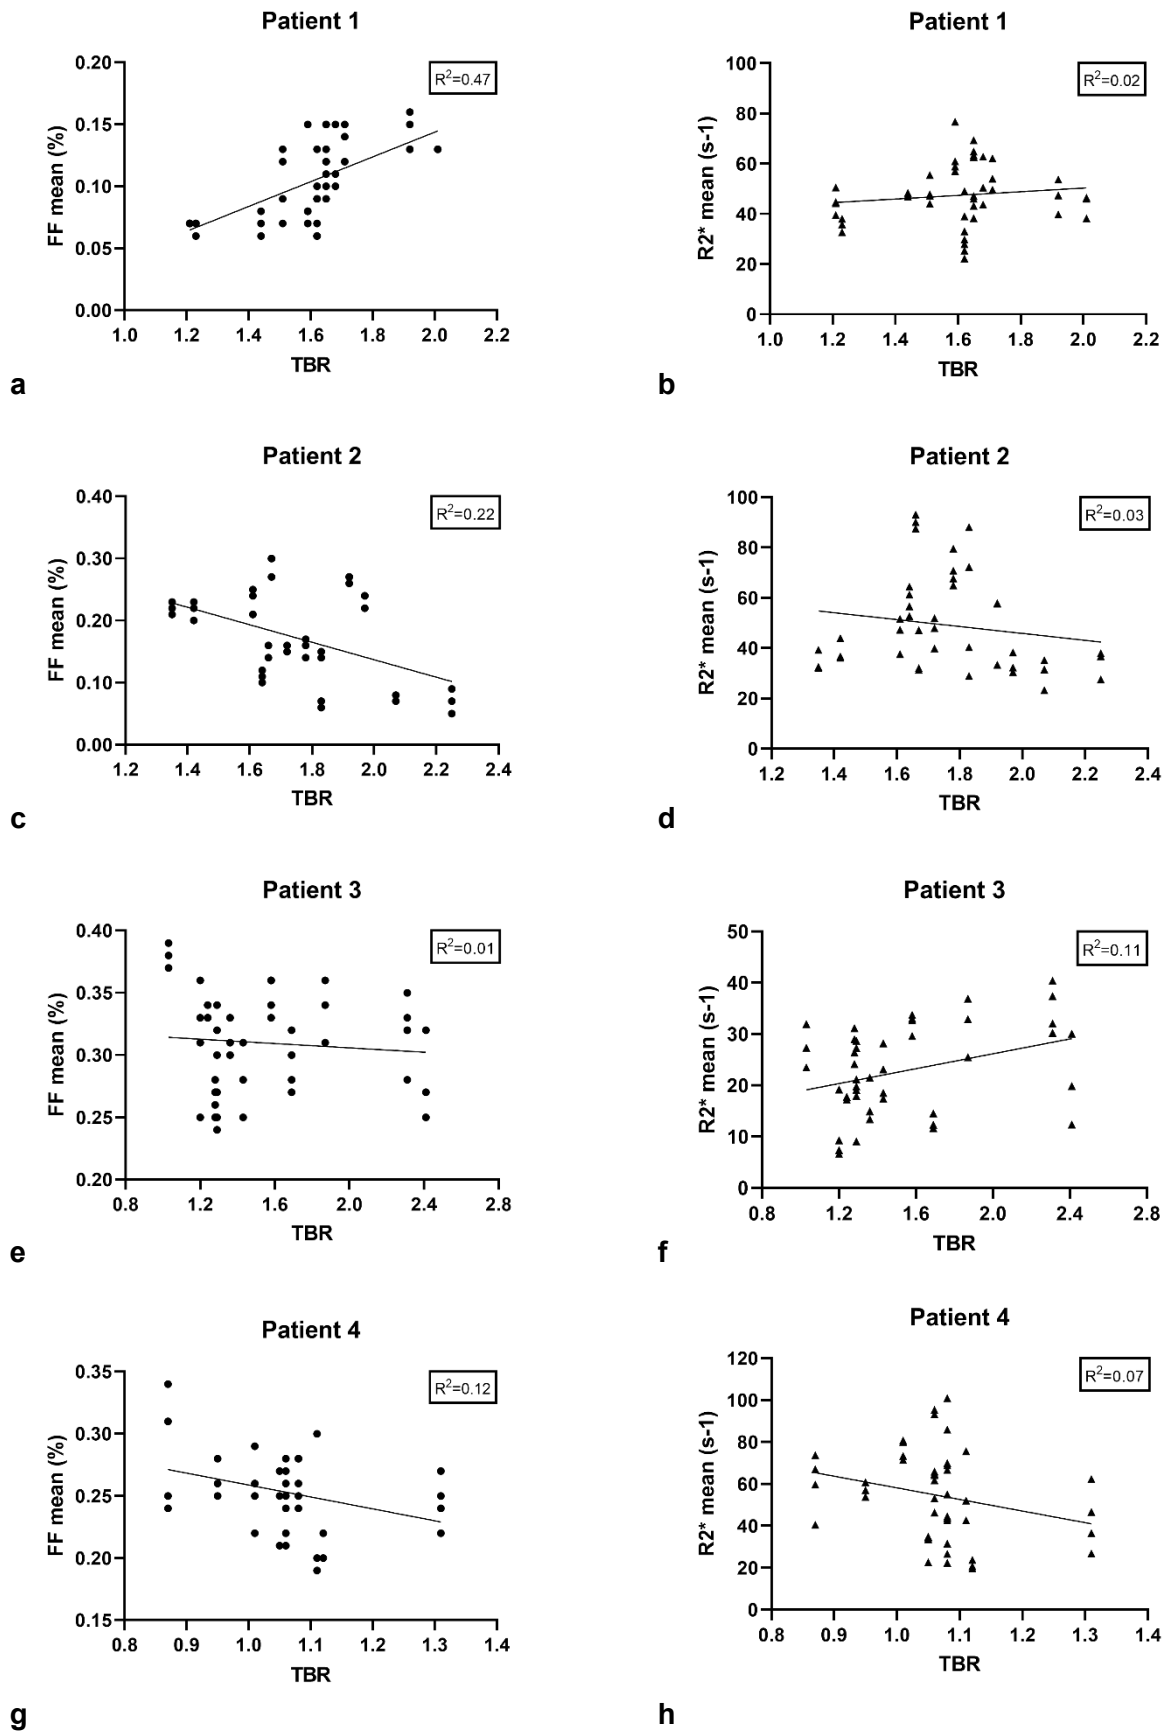

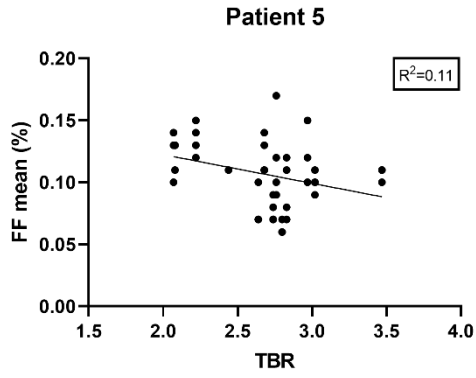

i

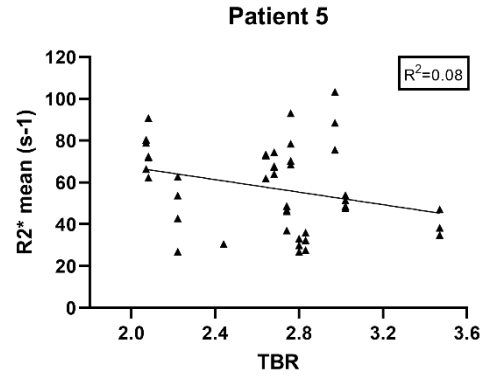

j

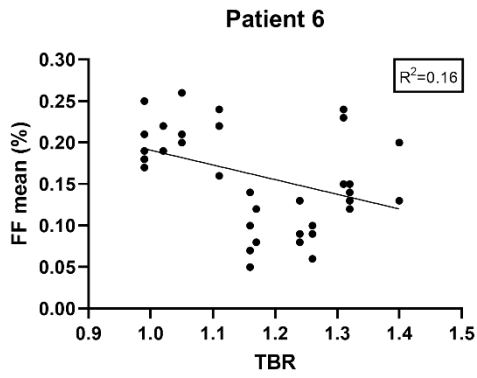

k

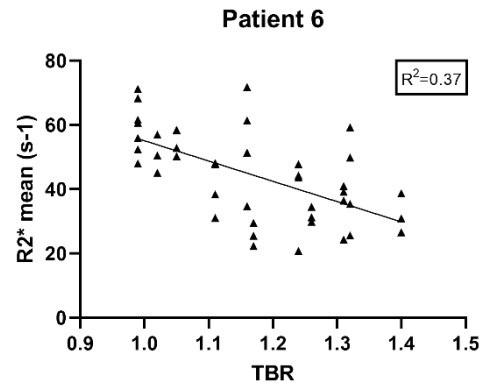

l

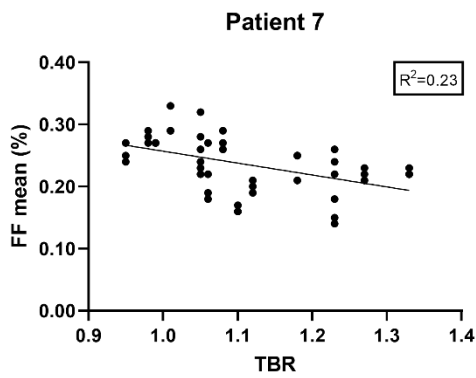

m

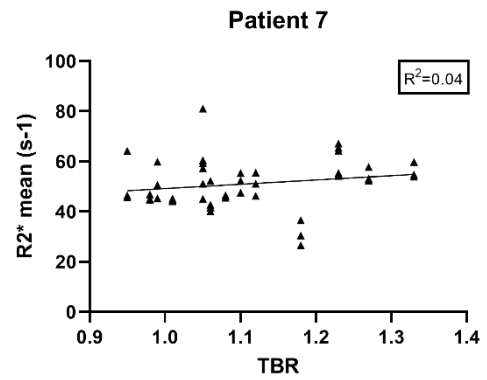

n

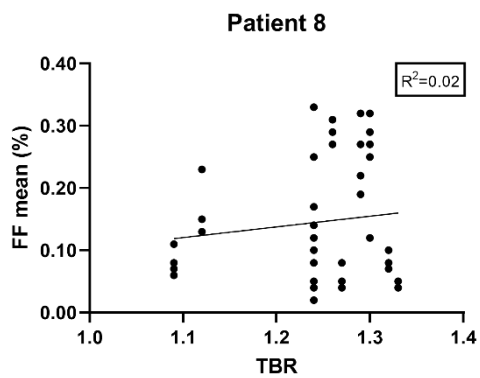

o

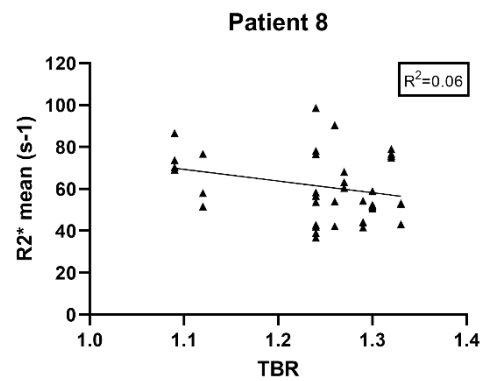

p

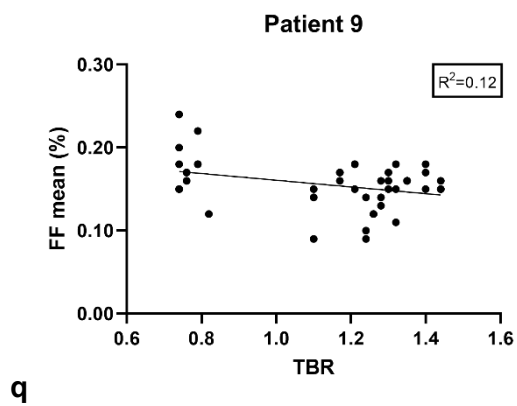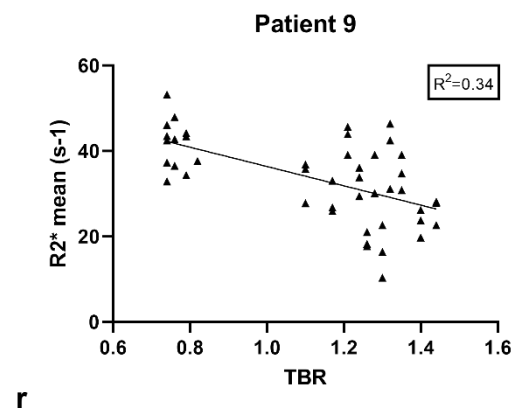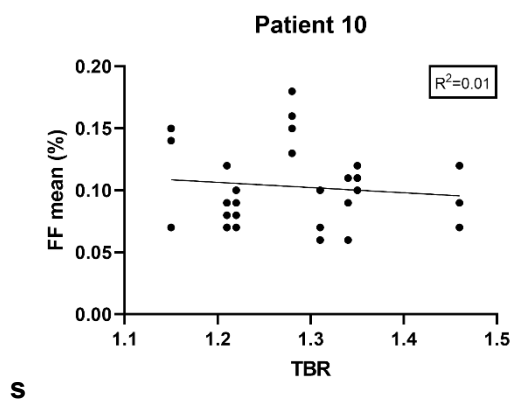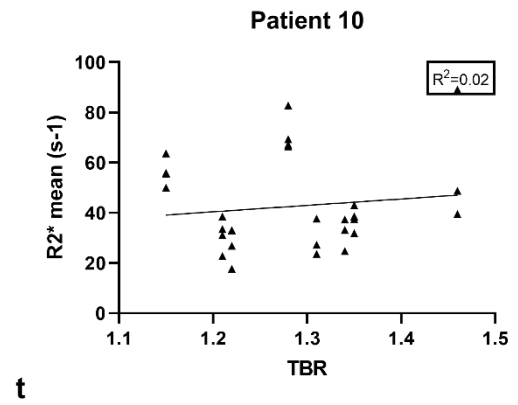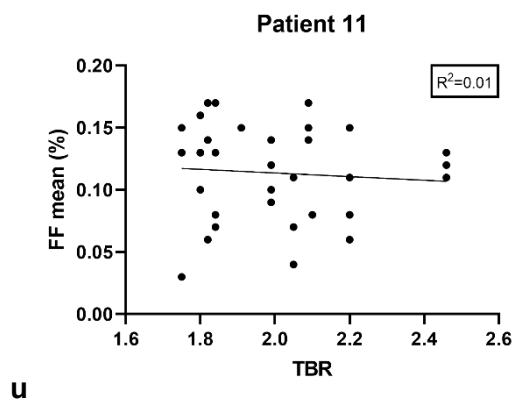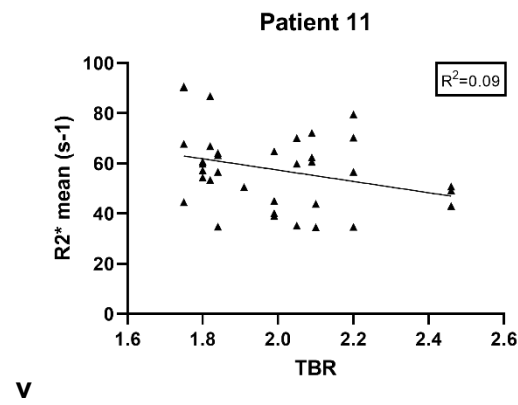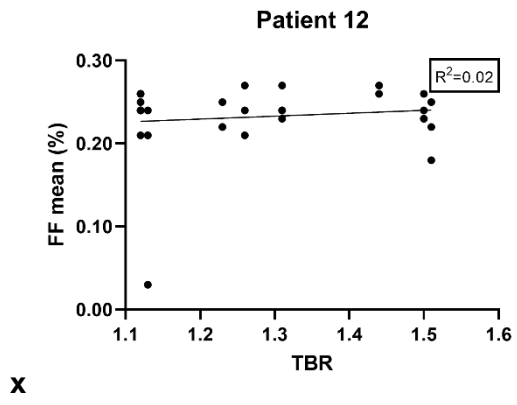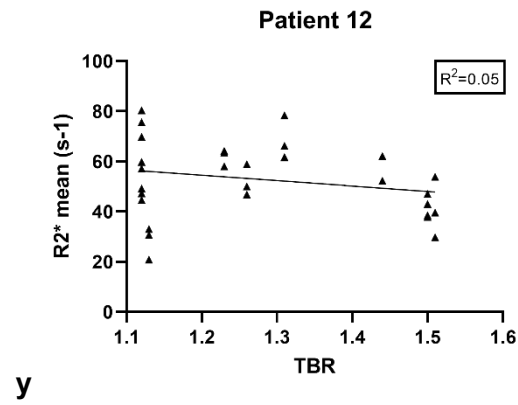

**Suppl Fig S4** Correlation plots in carotid plaques for all 12 patients. Simple linear regression was performed using GraphPad Prism version 9.0.0 for Windows, GraphPad Software, San Diego, California USA, [www.graphpad.com](http://www.graphpad.com)

FF, fat fraction; TBR, target-to-blood pool ratio

**Supplementary Figure S5. Intraplaque accumulation of <sup>18</sup>Fluorodeoxyglucose versus fat fraction and R2\***

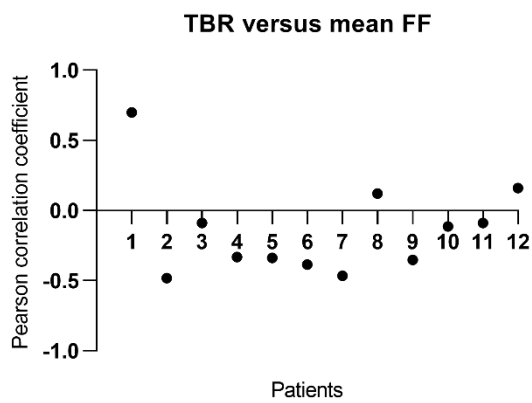

**a**

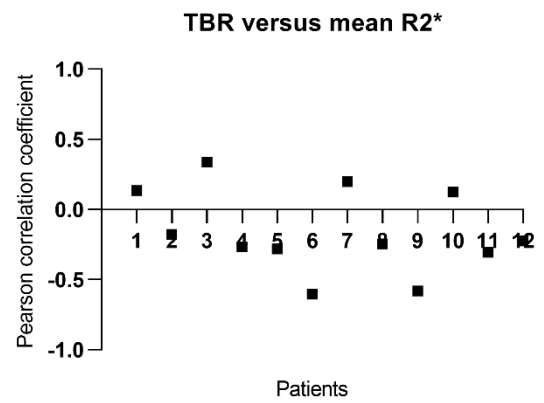

**b**

**Suppl Fig S5** The study number of each patient is listed along the x-axis. There was no statistically significant correlation between FF and TBR for any of the patients. Nor was there any significant correlation between R2\* and TBR in this analysis.

FF, fat fraction; TBR, target-to-blood pool ratio
